# Supplementary material for: Cobalt(iii)-catalyzed C–H halogenation of 6-arylpurines: facile entry into arylated, sulfenylated and alkoxylated 6-arylpurines
Source: Royal Society of Chemistry journal article supplement (doi:10.1039/c5ob02640g), 2016-01-01

## Supporting Information

### **Cobalt(III)-Catalyzed C–H Halogenation of 6-Arylpurines: Facile Entry into Arylated, Sulfenylated and Alkoxyated 6-Arylpurines**

Amit B. Pawar\*<sup>†</sup> and Dhanaji M. Lade<sup>†,‡</sup>

<sup>†</sup>Division of Natural Product Chemistry, CSIR-Indian Institute of Chemical Technology, Hyderabad 500007, India

*Email: amitorgchem@gmail.com*

<sup>‡</sup>Academy of Scientific and Innovative Research (AcSIR), New Delhi, India

|          |                                                                                                    |     |
|----------|----------------------------------------------------------------------------------------------------|-----|
|          | <b>Table of Content</b>                                                                            | S-1 |
| <b>1</b> | <b>H/D Exchange Experiment</b>                                                                     | S-2 |
| <b>2</b> | <b>Intermolecular Competitive Experiment</b>                                                       | S-3 |
| <b>3</b> | <b>Spectral Copies of <sup>1</sup>H and <sup>13</sup>C NMR of Compounds Obtained in this Study</b> | S-4 |

## 1. H/D Exchange Experiment (Scheme 3 a)

To a dried screw capped vial with a spinvane triangular-shaped Teflon stirbar were added **1ba** (18.5 mg, 0.10 mmol), [Cp\*CoI<sub>2</sub>]<sub>2</sub> (4.8 mg, 10 mol %), AgNTf<sub>2</sub> (7.8 mg, 20 mol %) AgOAc (3.3 mg, 20 mol%), CD<sub>3</sub>OD (40 μL) and 1,2-dichloroethane (0.5 mL) under argon atmosphere. The reaction mixture was stirred at 80 °C for 12 h, cooled to room temperature, filtered through a pad of celite and then washed with EtOAc (10 mL × 3). The solvent was removed under reduced pressure and the extents of deuterium incorporation was measured by <sup>1</sup>H NMR analysis of the crude mixture.

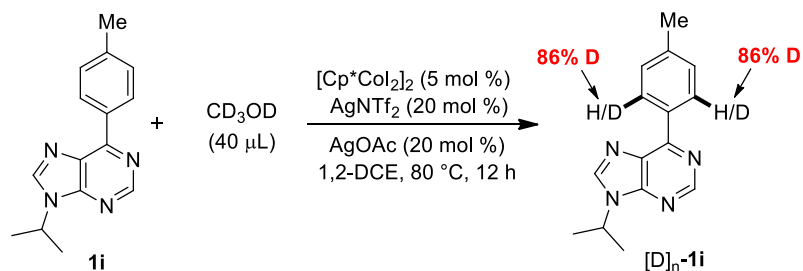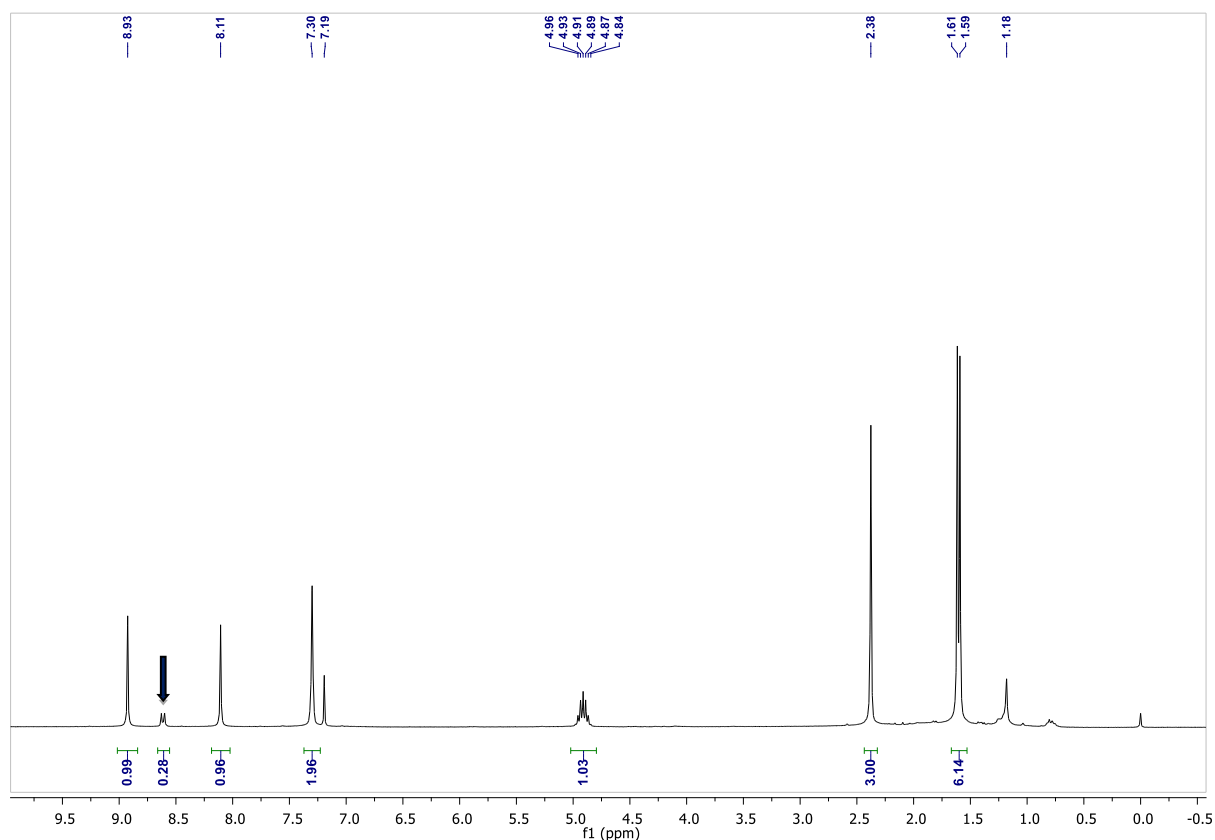

**Figure S1.** Crude <sup>1</sup>H NMR for H/D exchange experiment of **1i** with CD<sub>3</sub>OD.

## 2. Intermolecular competitive Experiment (Scheme 3 b)

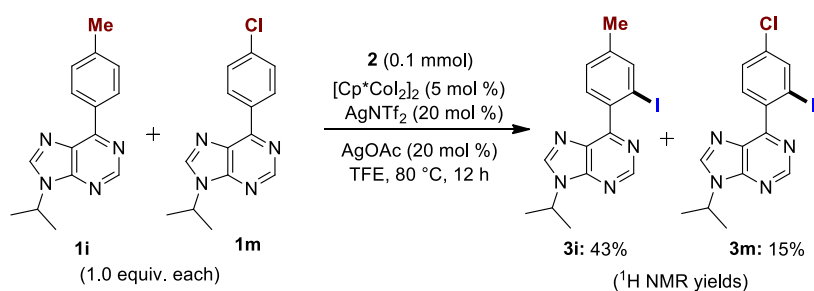

To a dried screw capped vial with a spinvane triangular-shaped Teflon stirbar were added **1i** (18.5 mg, 0.10 mmol), **1m** (18.5 mg, 0.10 mmol), *N*-iodosuccinimide (18.5 mg, 0.10 mmol),  $[\text{Cp}^*\text{CoI}_2]_2$  (4.8 mg, 10 mol %),  $\text{AgNTf}_2$  (7.8 mg, 20 mol %),  $\text{AgOAc}$  (3.3 mg, 20 mol %), TFE (0.5 mL) under argon atmosphere. The reaction mixture was stirred at 80 °C for 12 h, cooled to room temperature, poured into water (20 mL) and then washed with EtOAc (15 mL  $\times$  2). The organic layer was washed with 1N NaOH (15 mL), dried over  $\text{Na}_2\text{SO}_4$  and filtered. The solvent was evaporated under reduced pressure. The conversions of **3i** and **3m** was determined by  $^1\text{H}$  NMR analysis of the crude mixture using 1,1,2,2-tetrachloroethane as an internal standard.

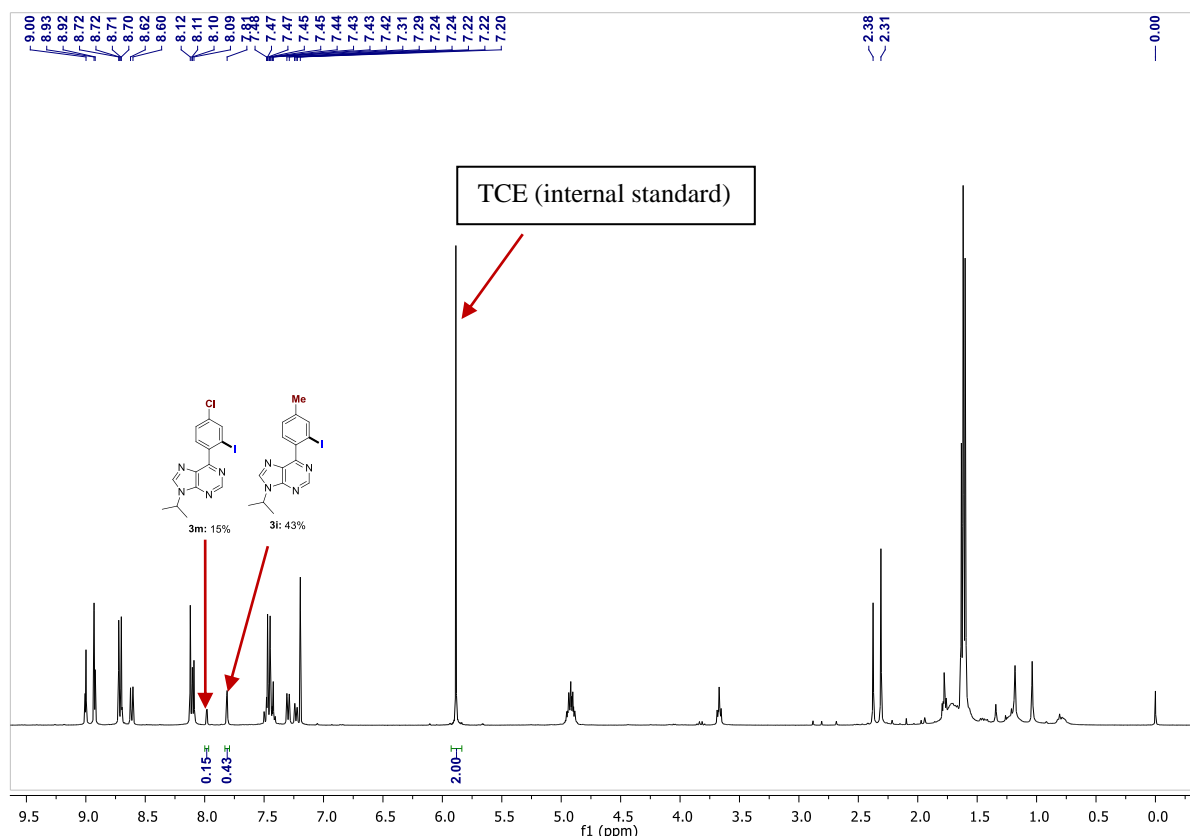

Figure S2. Crude  $^1\text{H}$  NMR for intermolecular competitive experiment between **1i** and **1m**.

### **3. Spectral Copies of $^1\text{H}$ and $^{13}\text{C}$ NMR of Compounds Obtained in this Study**

# 6-(2-Iodophenyl)-9-isopropyl-9H-purine (3a)

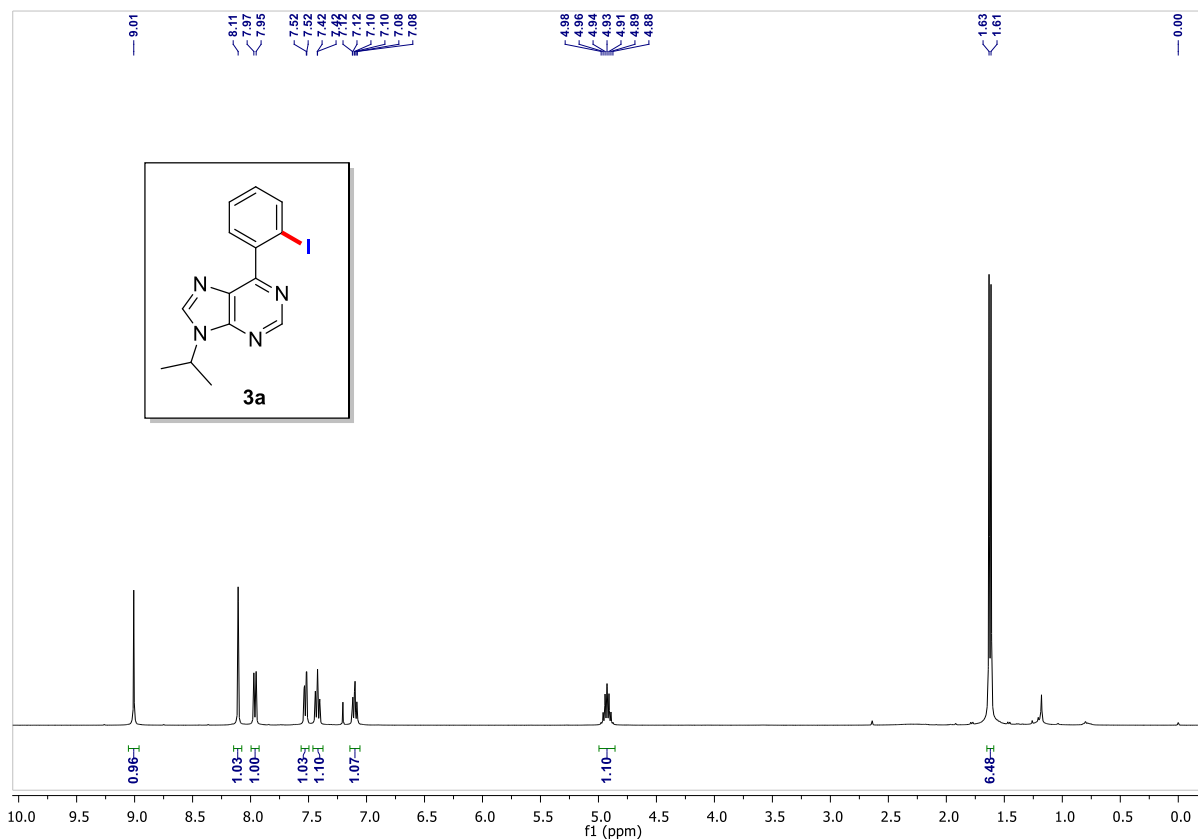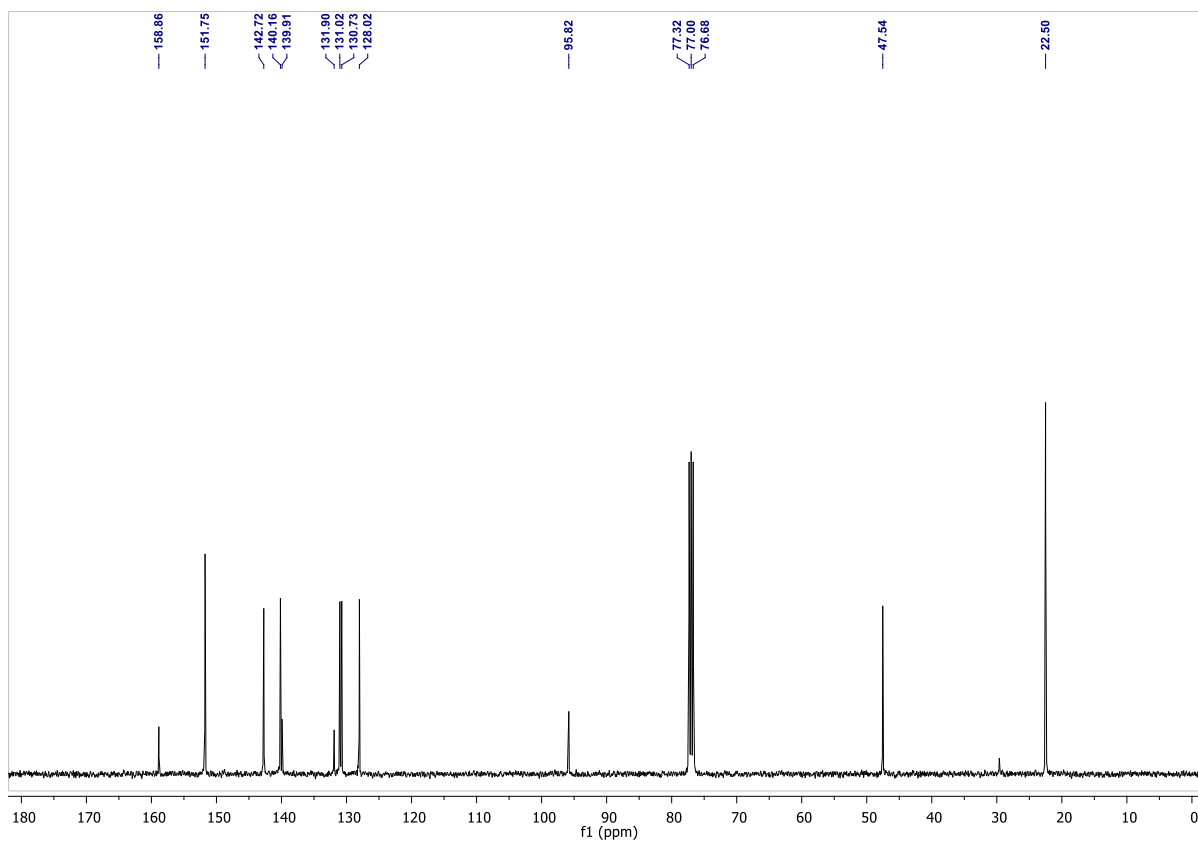

### 9-Benzyl-6-(2-iodophenyl)-9H-purine (3b)

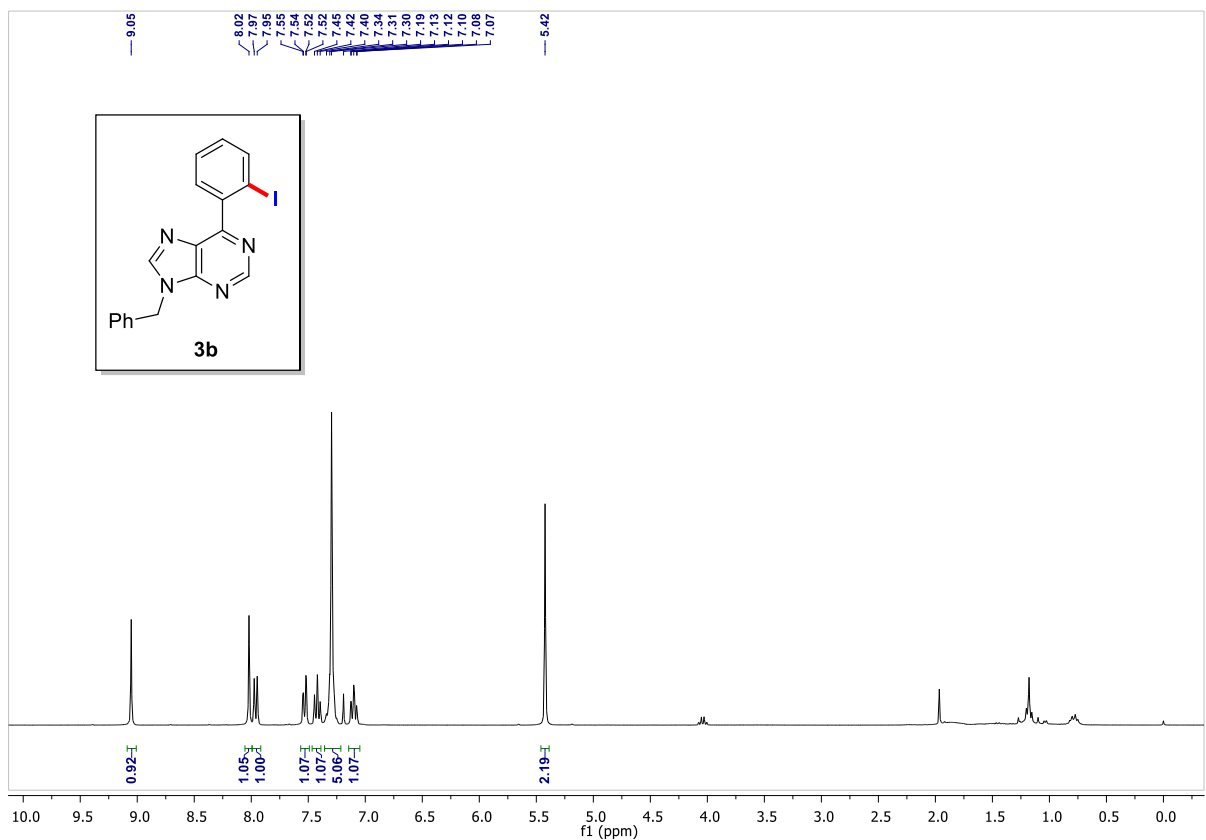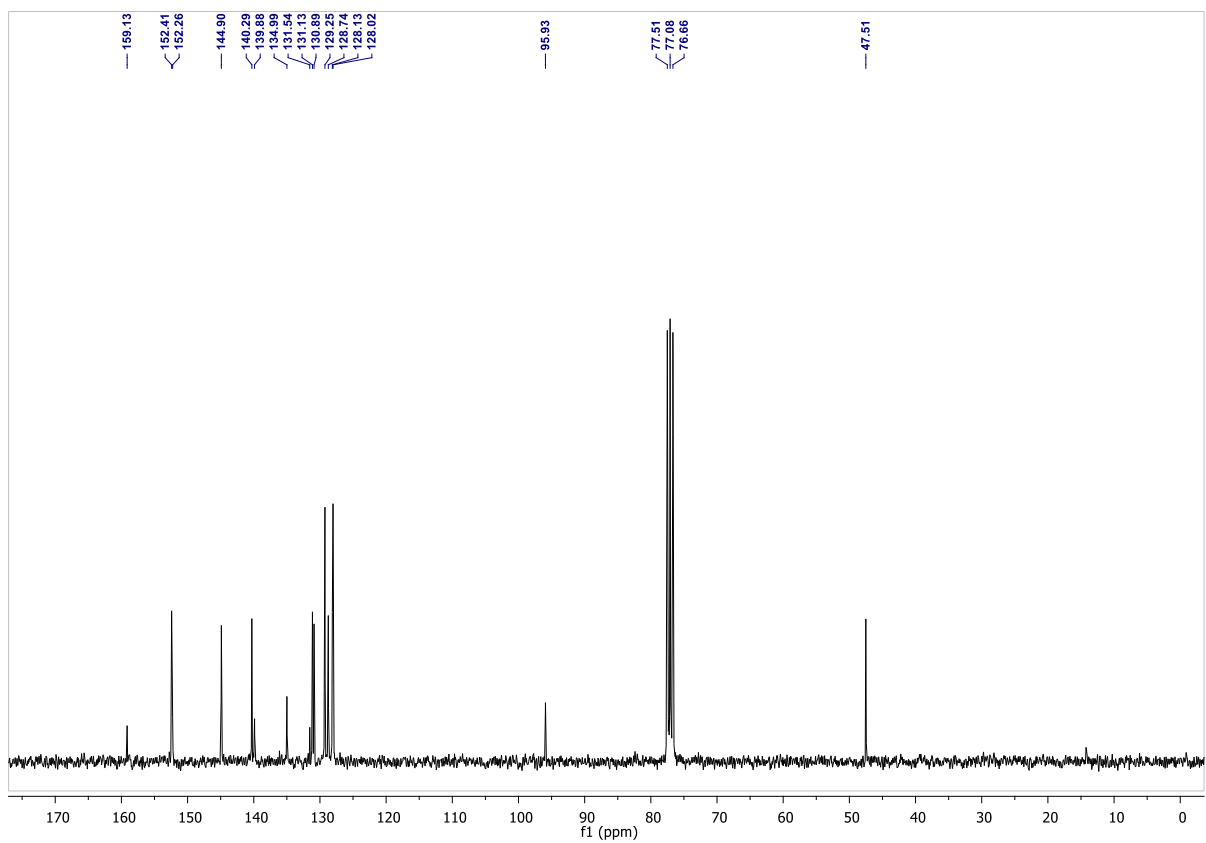

# 9-Butyl-6-(2-iodophenyl)-9H-purine (3c)

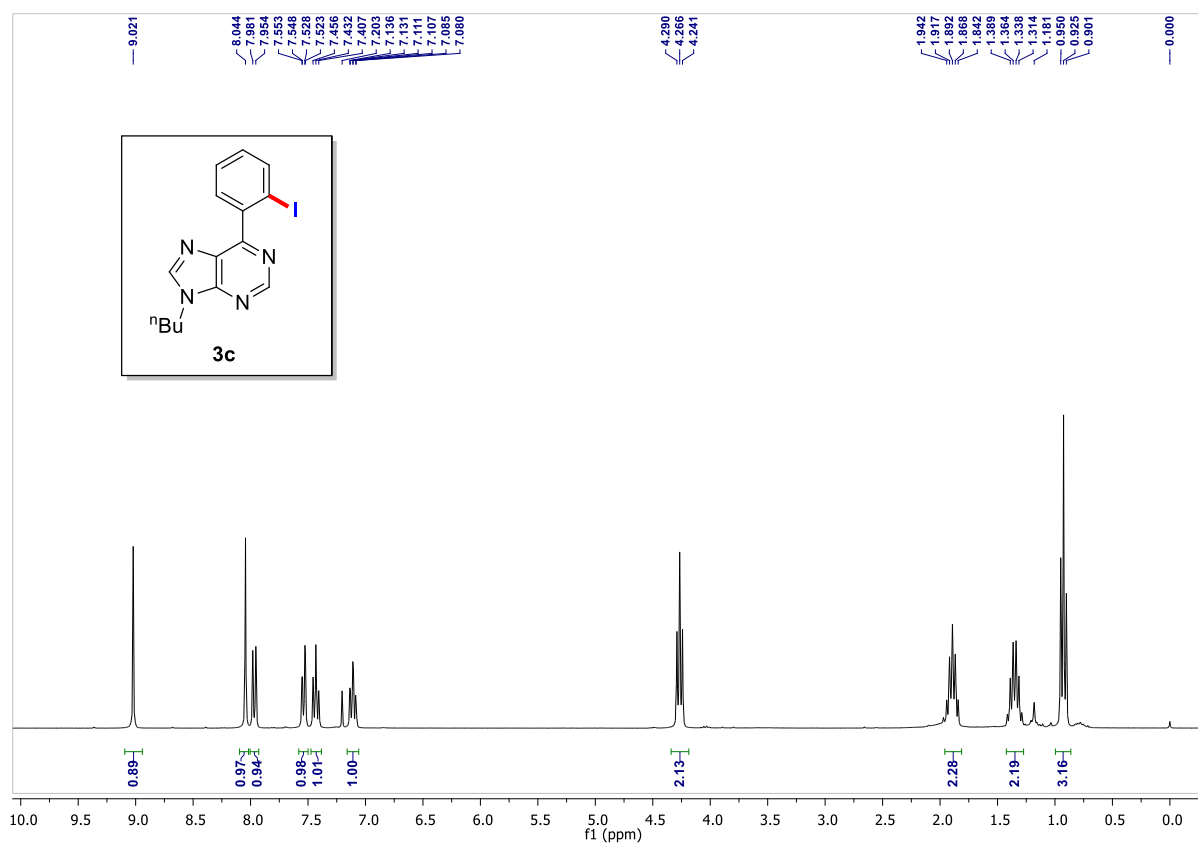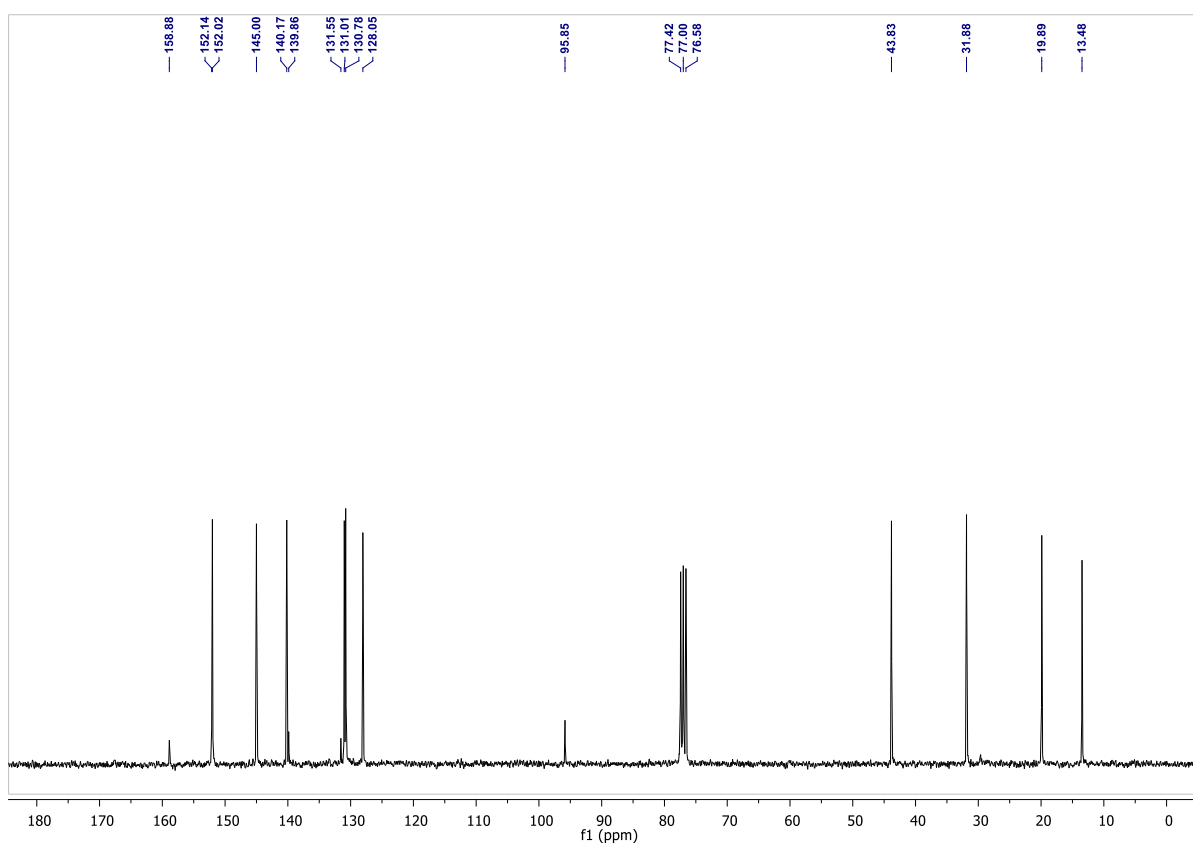

# 9-Ethyl-6-(2-iodophenyl)-9H-purine (3d)

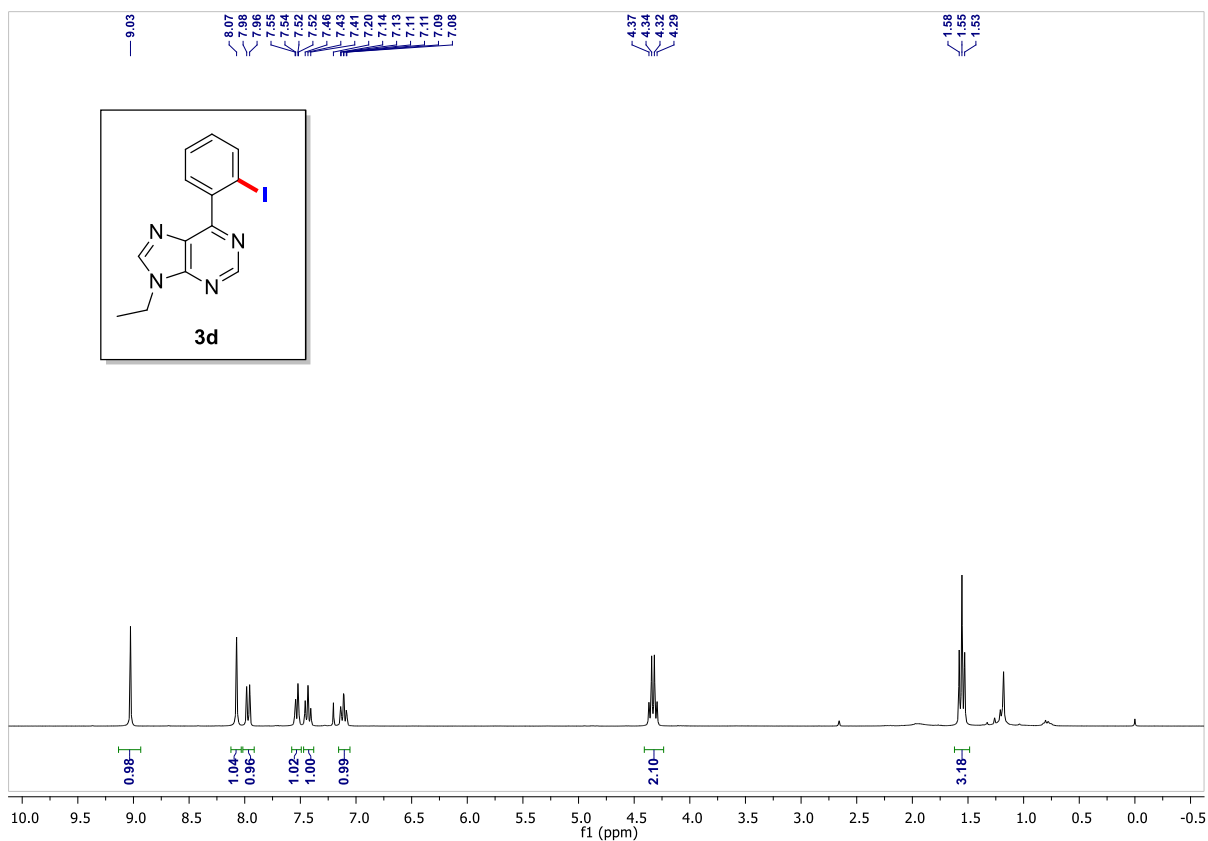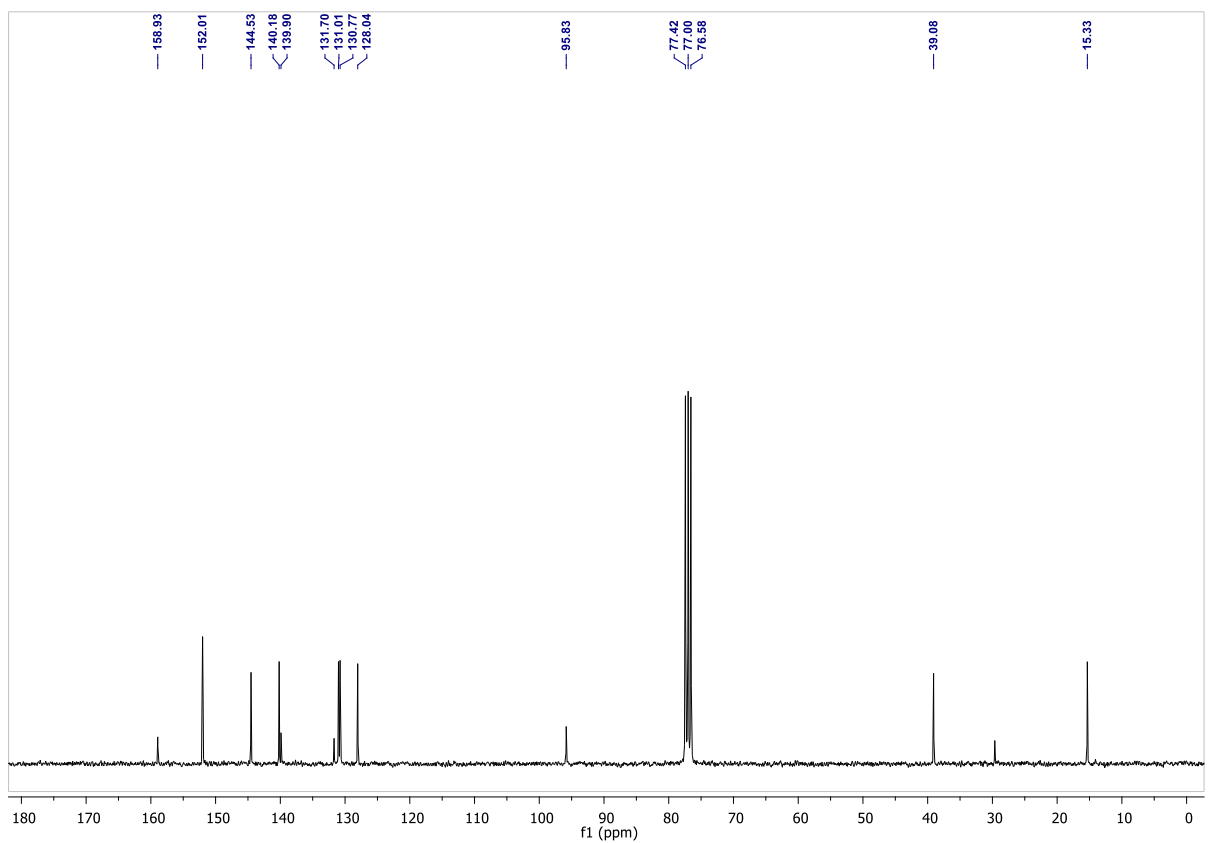



### 6-(2-Iodophenyl)-9-methyl-9H-purine (3e)

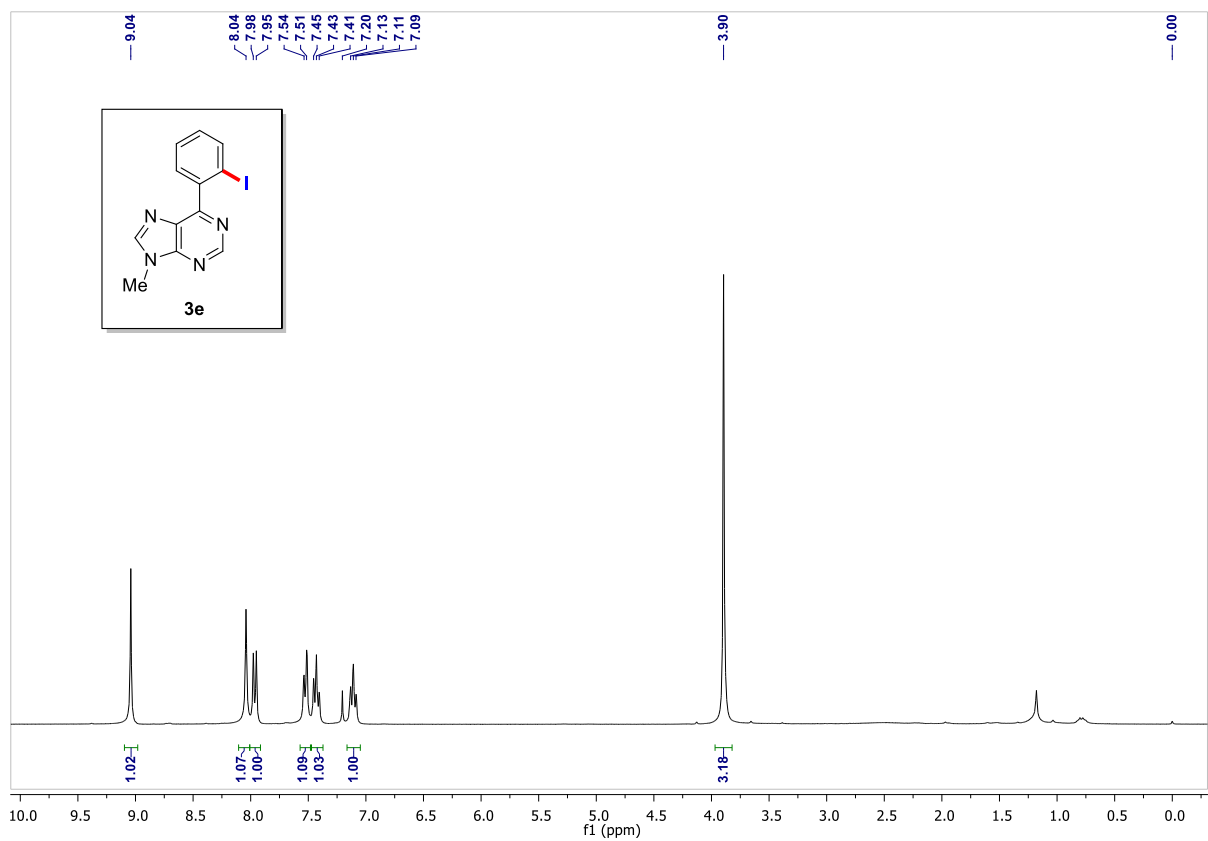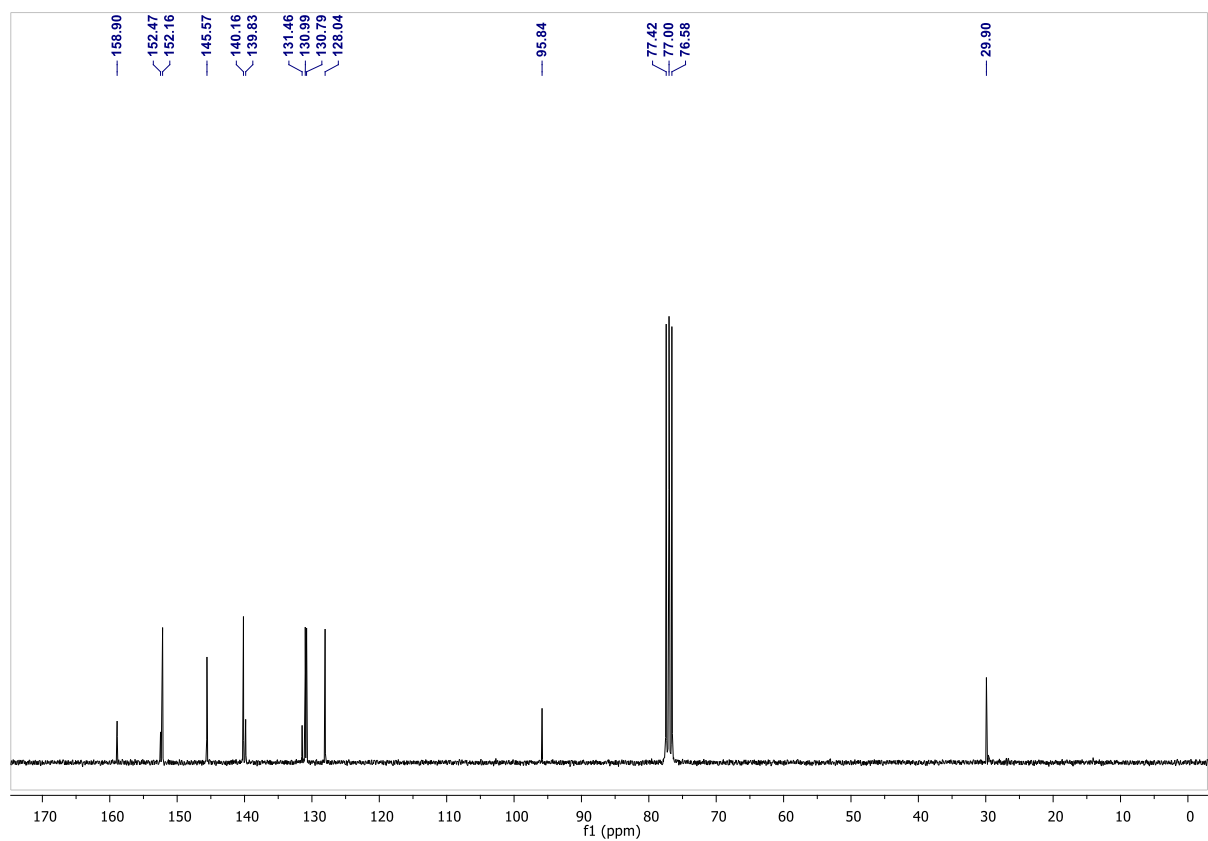

### 6-(2-Iodo-4-methoxyphenyl)-9-isopropyl-9H-purine (3h)

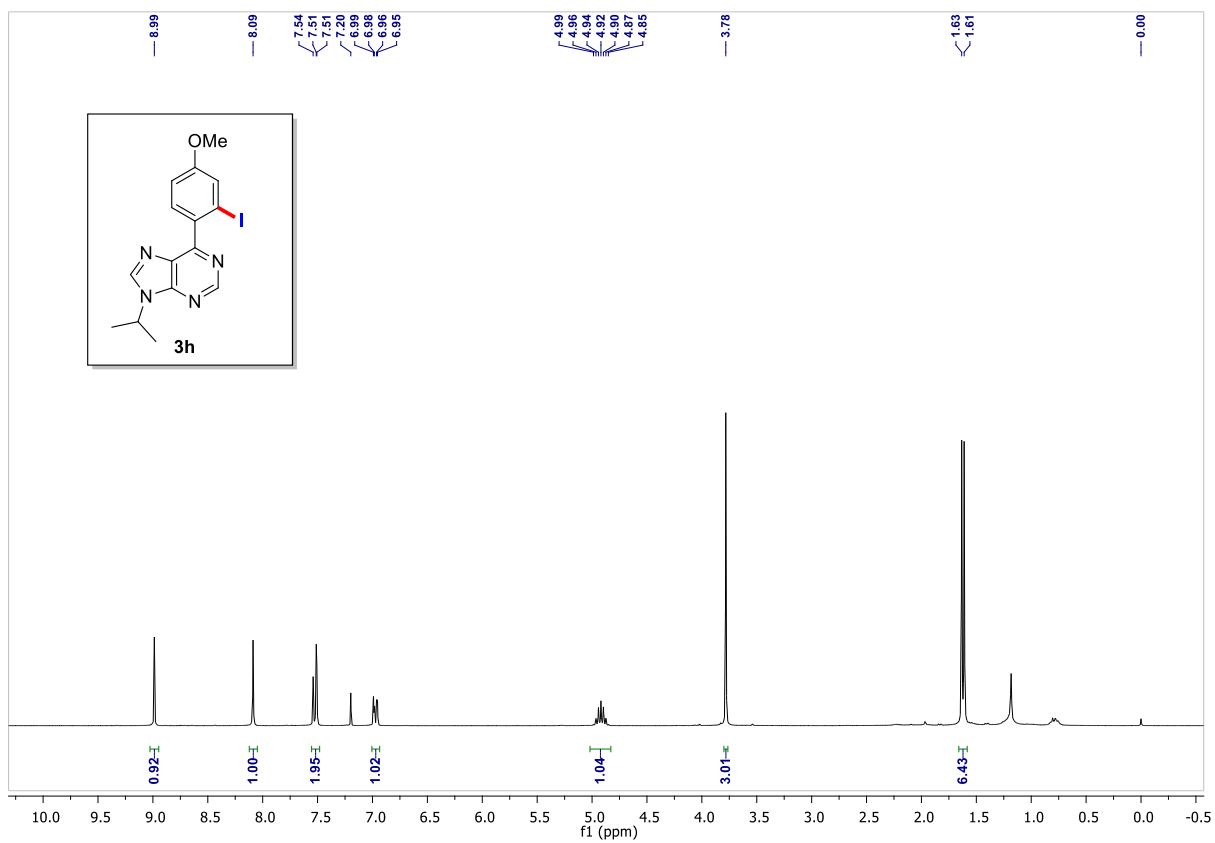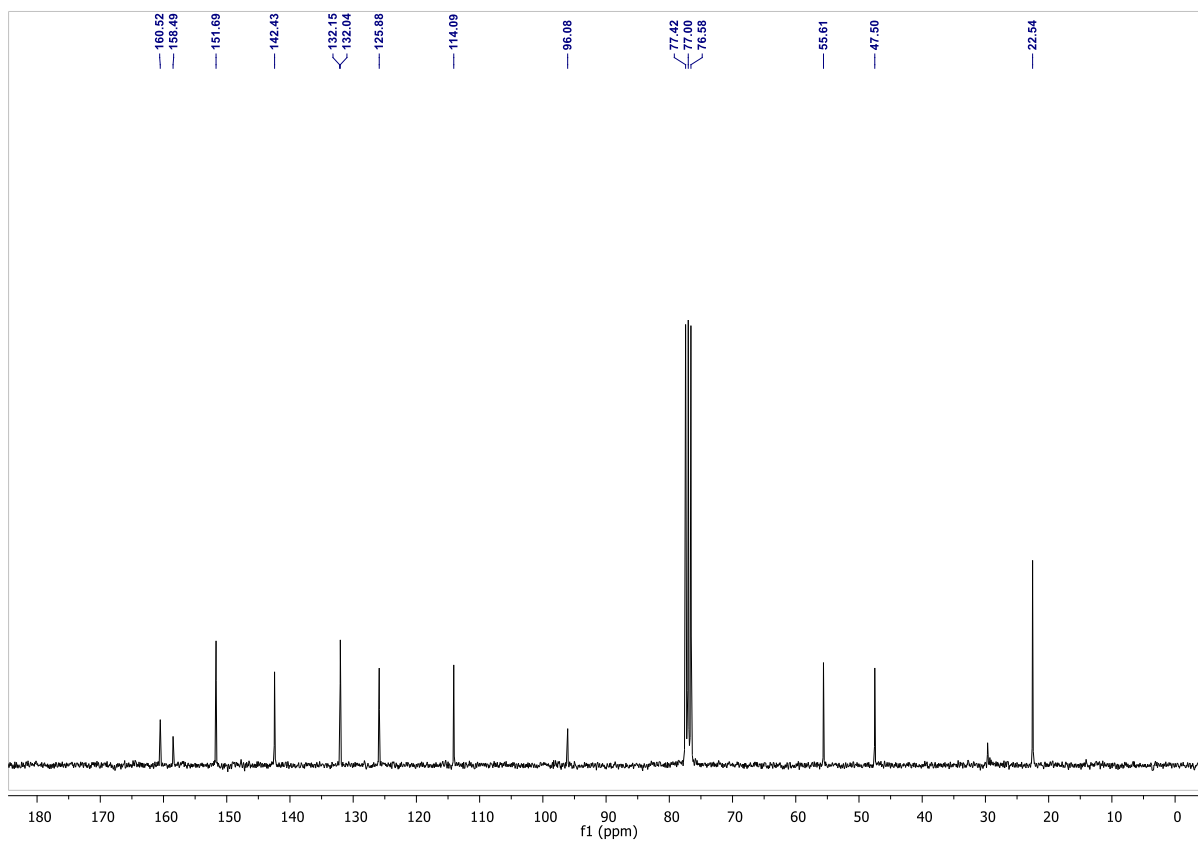

### 6-(2-Iodo-4-methylphenyl)-9-isopropyl-9H-purine (3i)

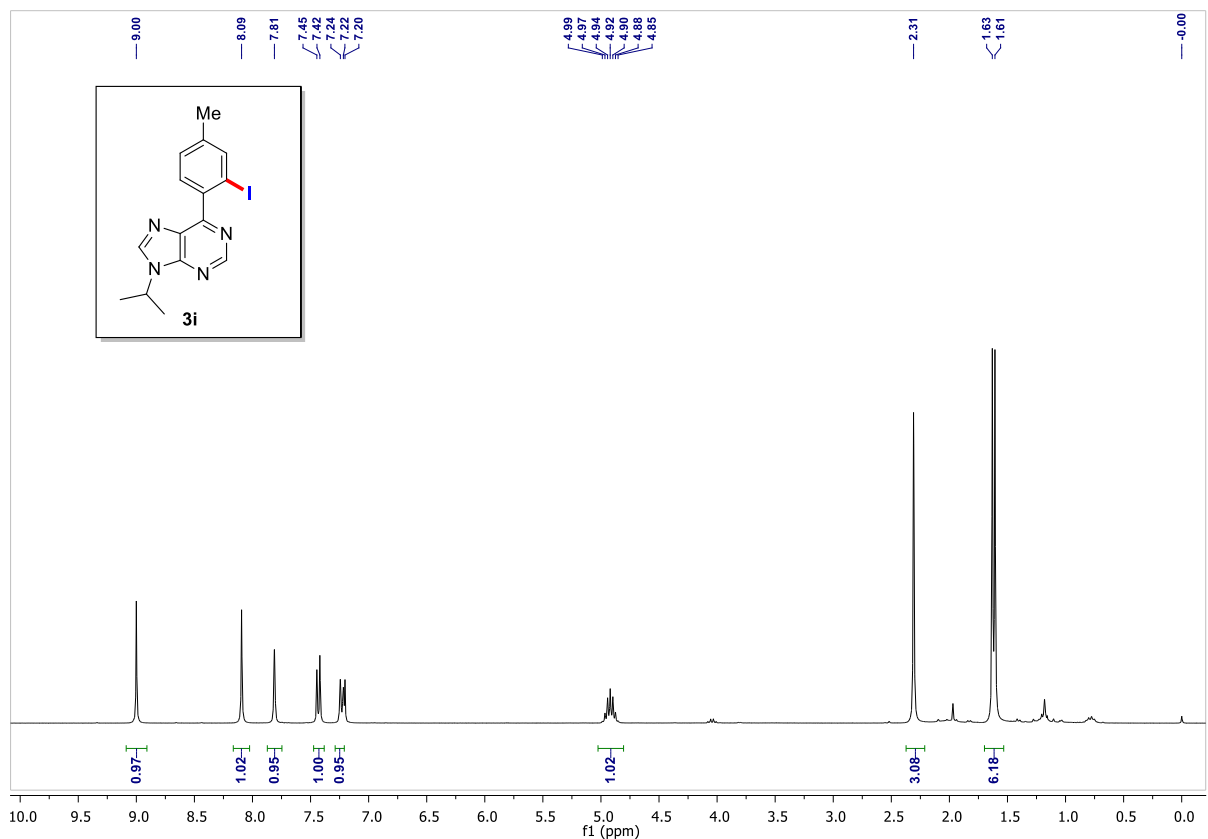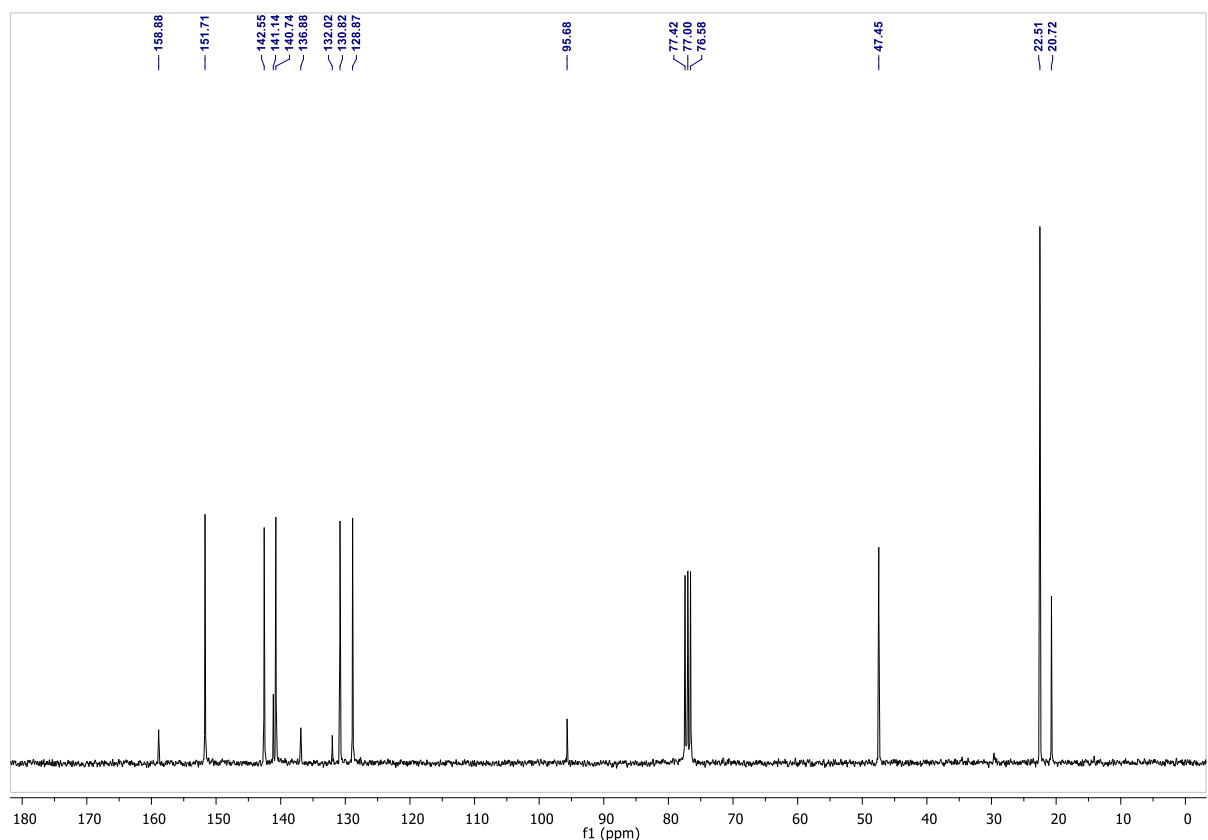

### 6-(3-Iodo-[1,1'-biphenyl]-4-yl)-9-isopropyl-9H-purine (3j)

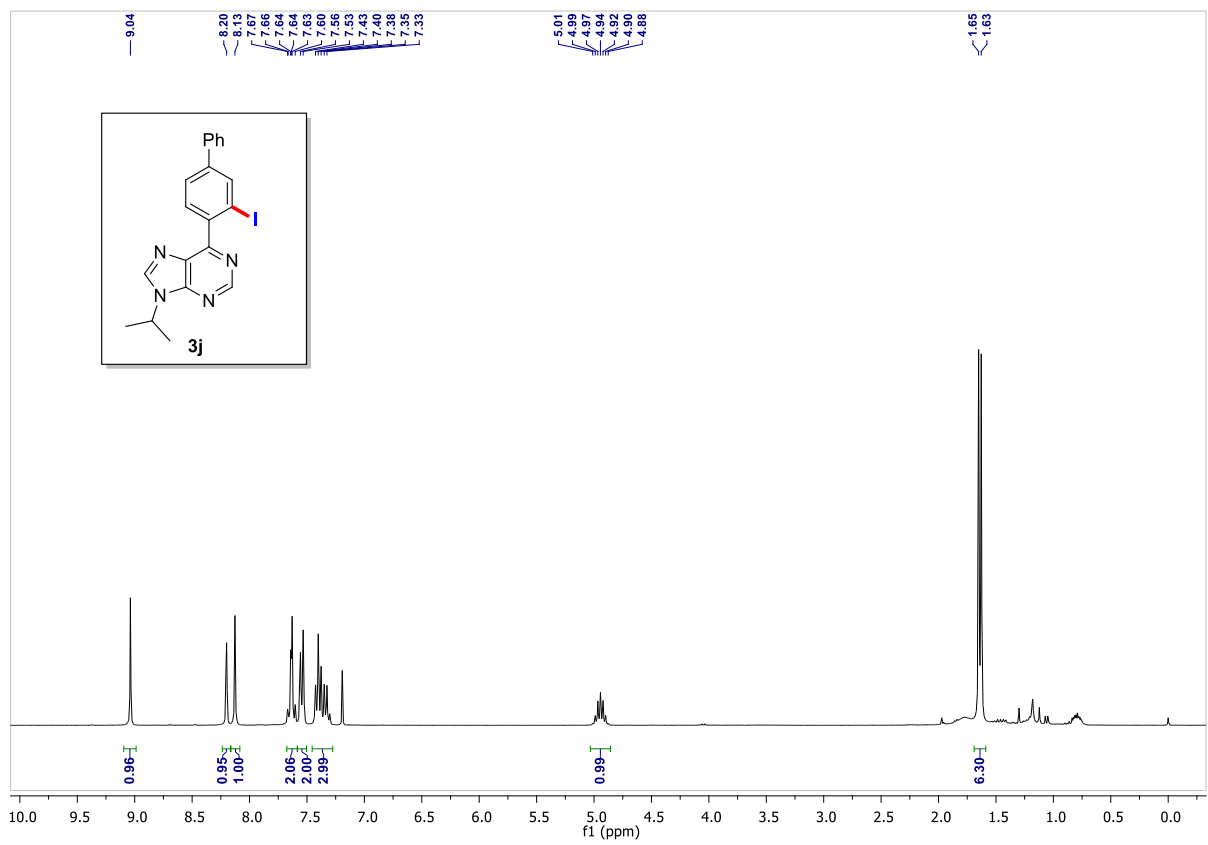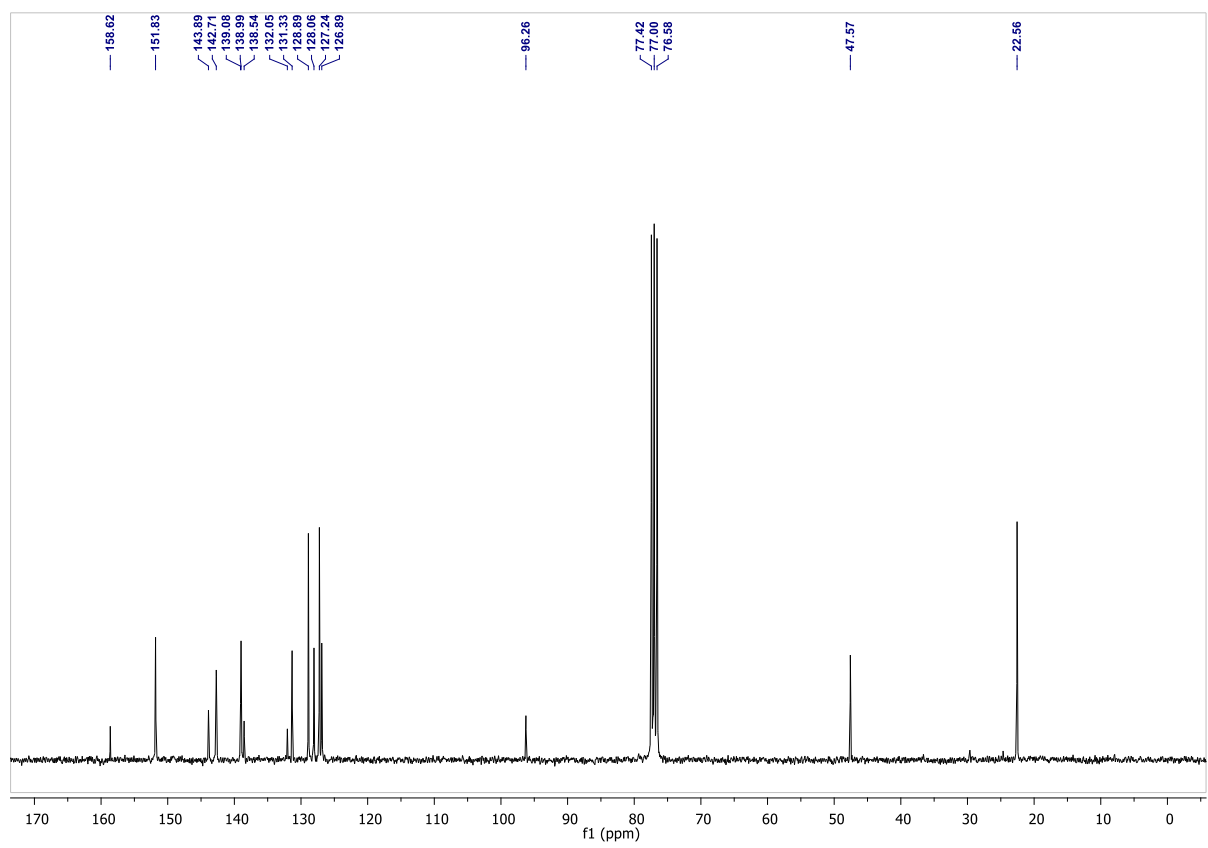

# 6-[4-(*tert*-Butyl)-2-iodophenyl]-9-isopropyl-9*H*-purine (3k)

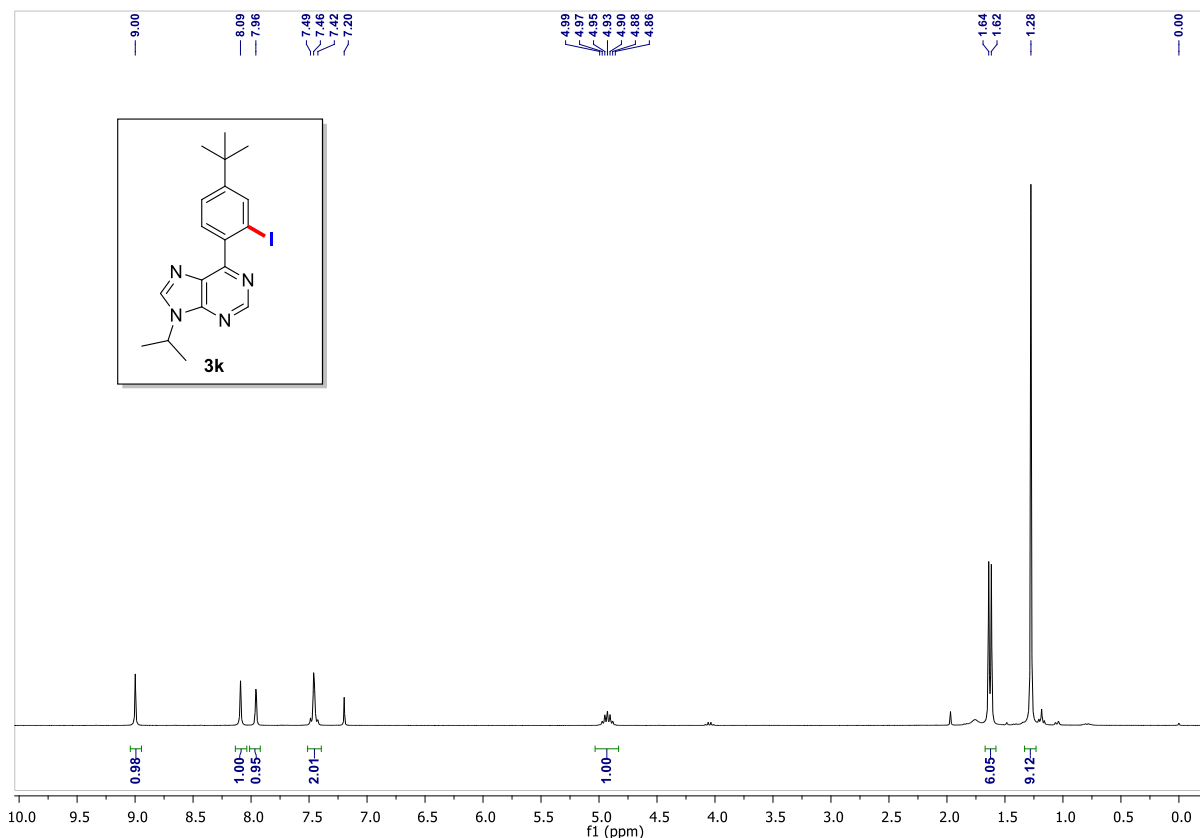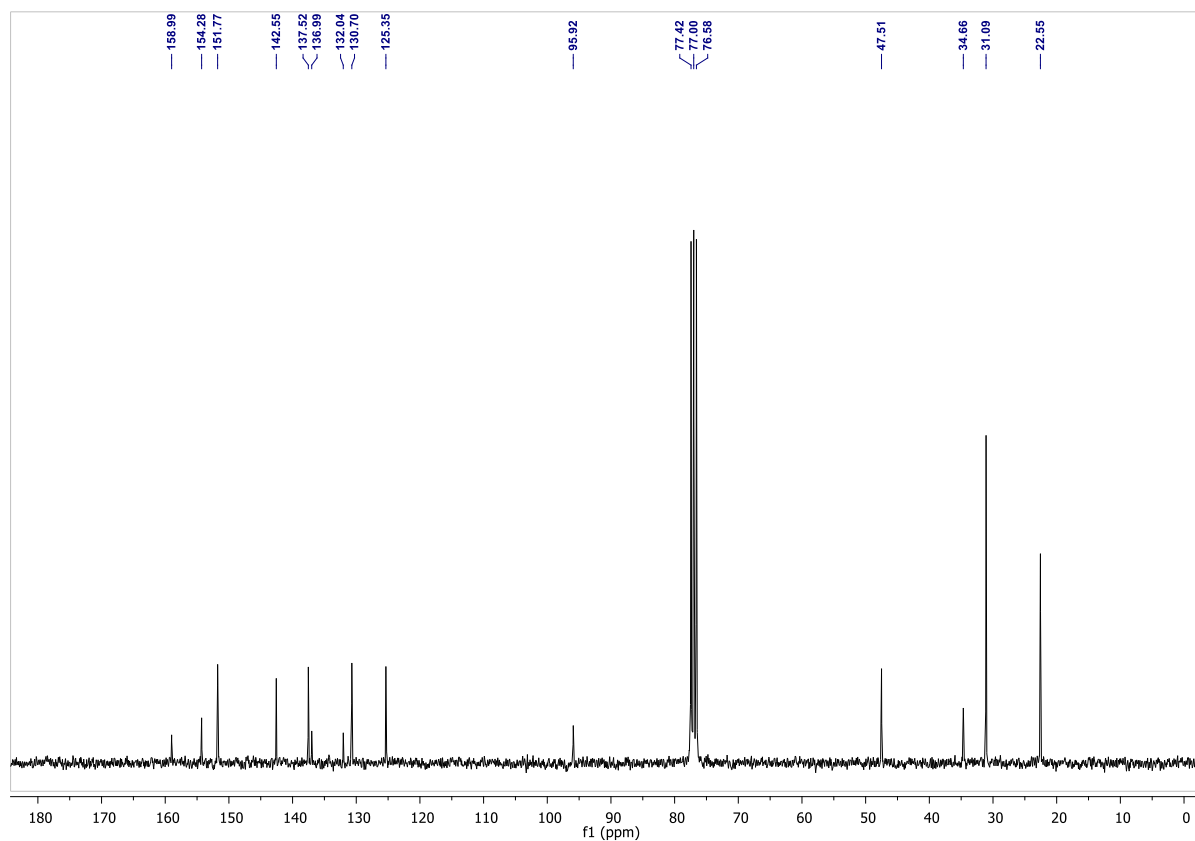

# 6-[4-(Benzyloxy)methyl-2-iodophenyl]-9-isopropyl-9H-purine (3I)

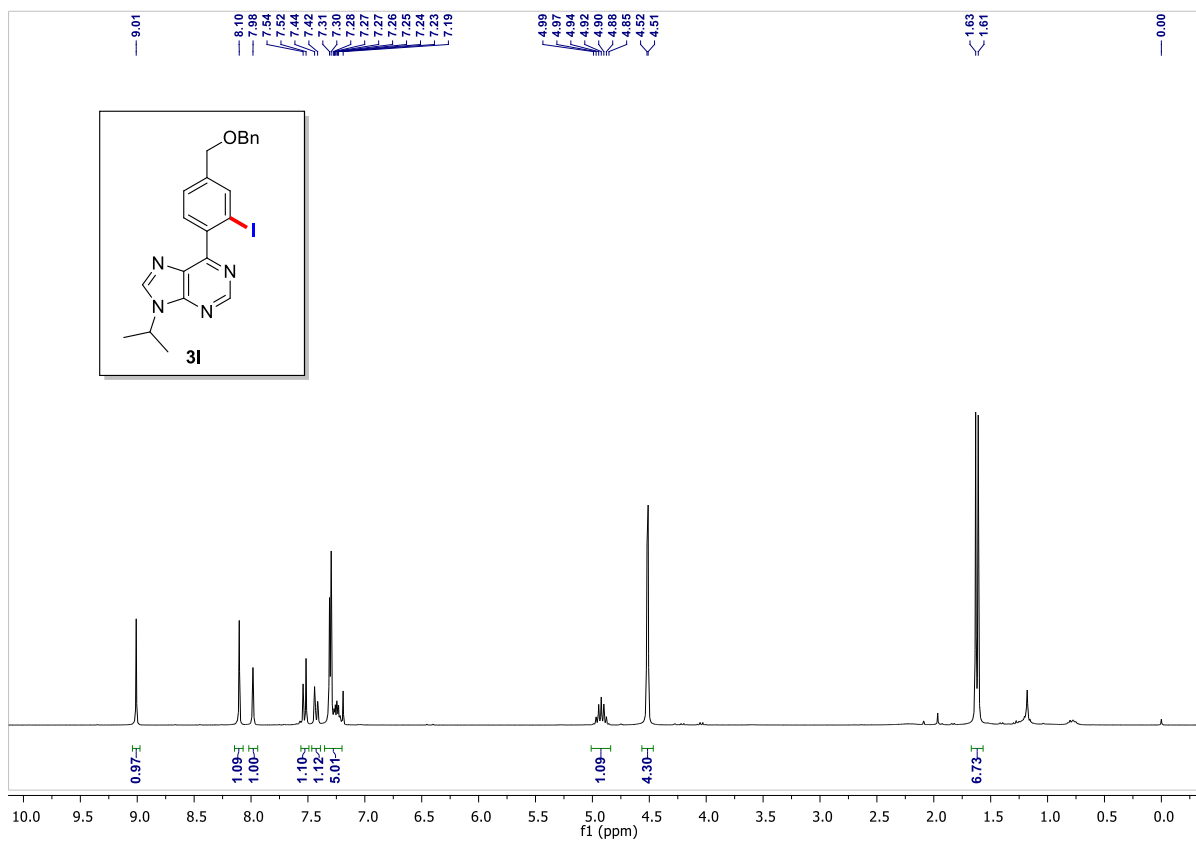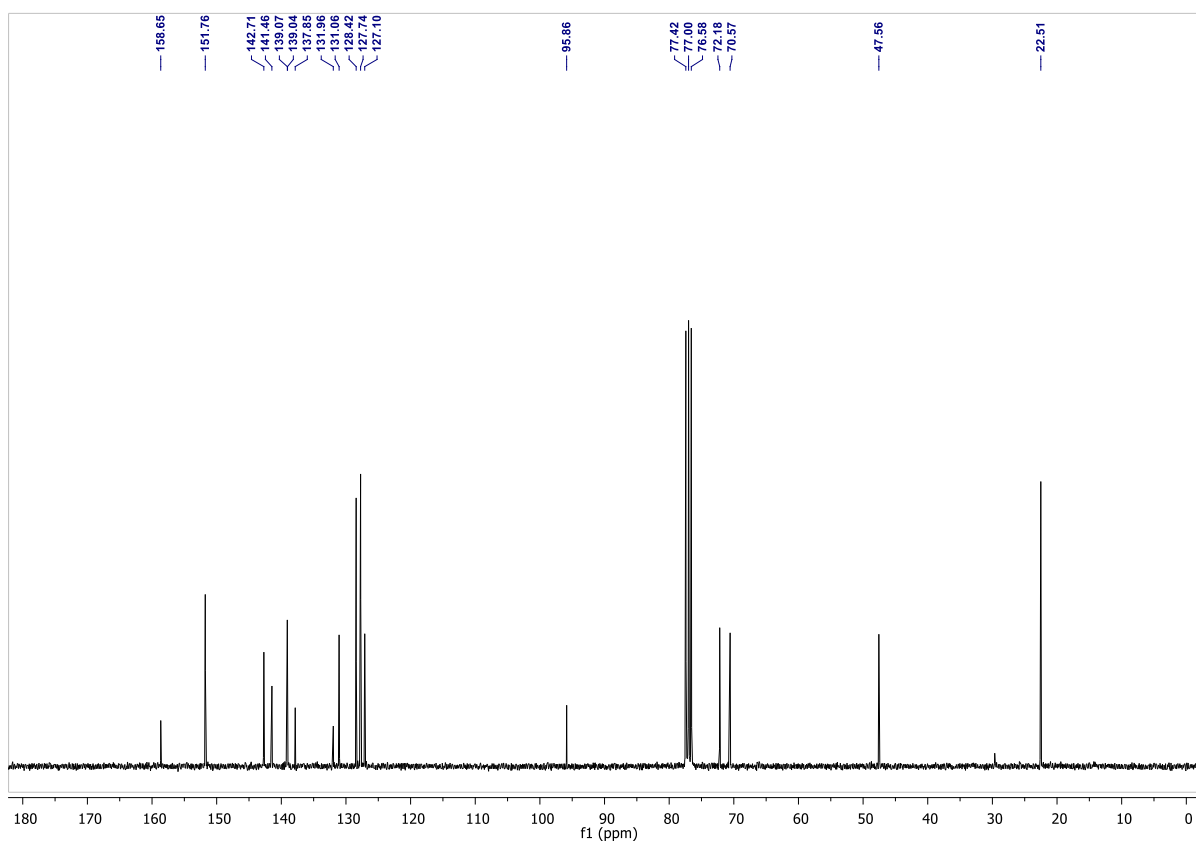

# 6-(4-Chloro-2-iodophenyl)-9-isopropyl-9H-purine (3m)

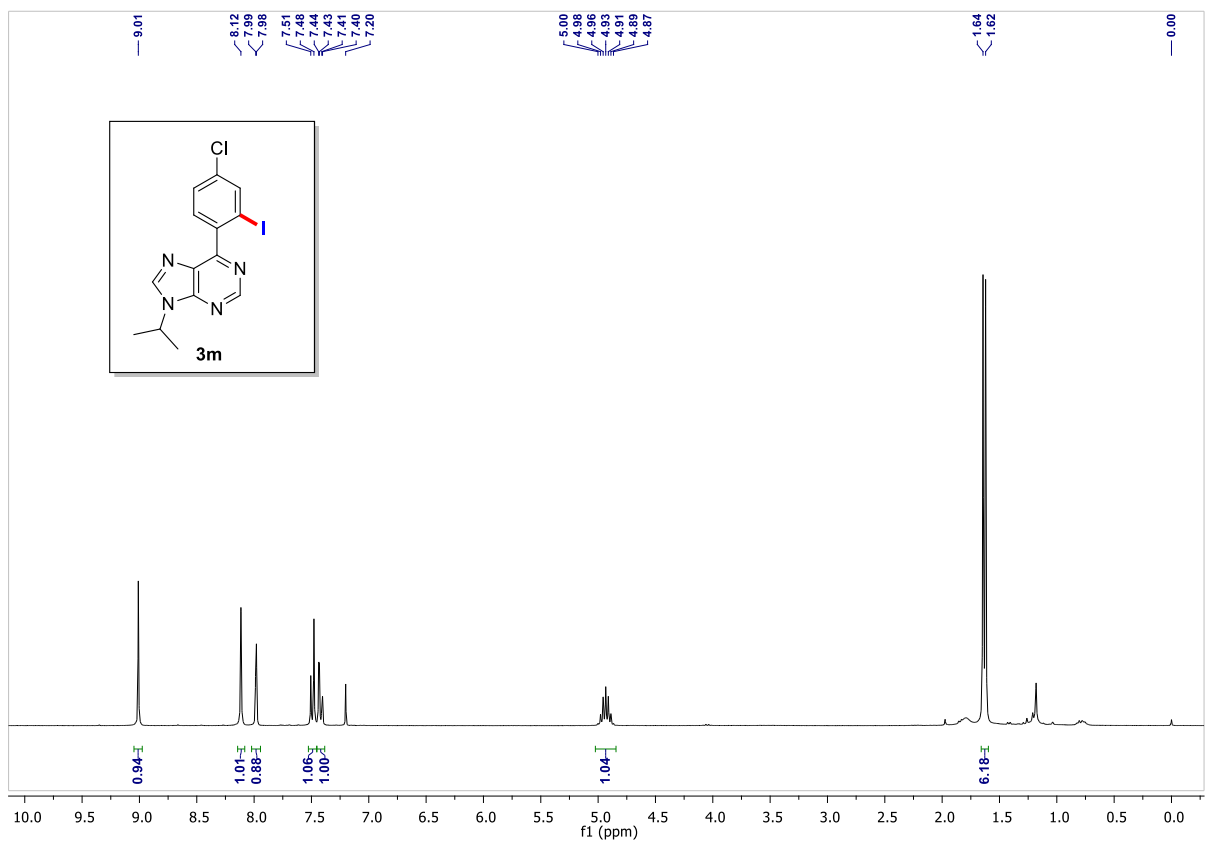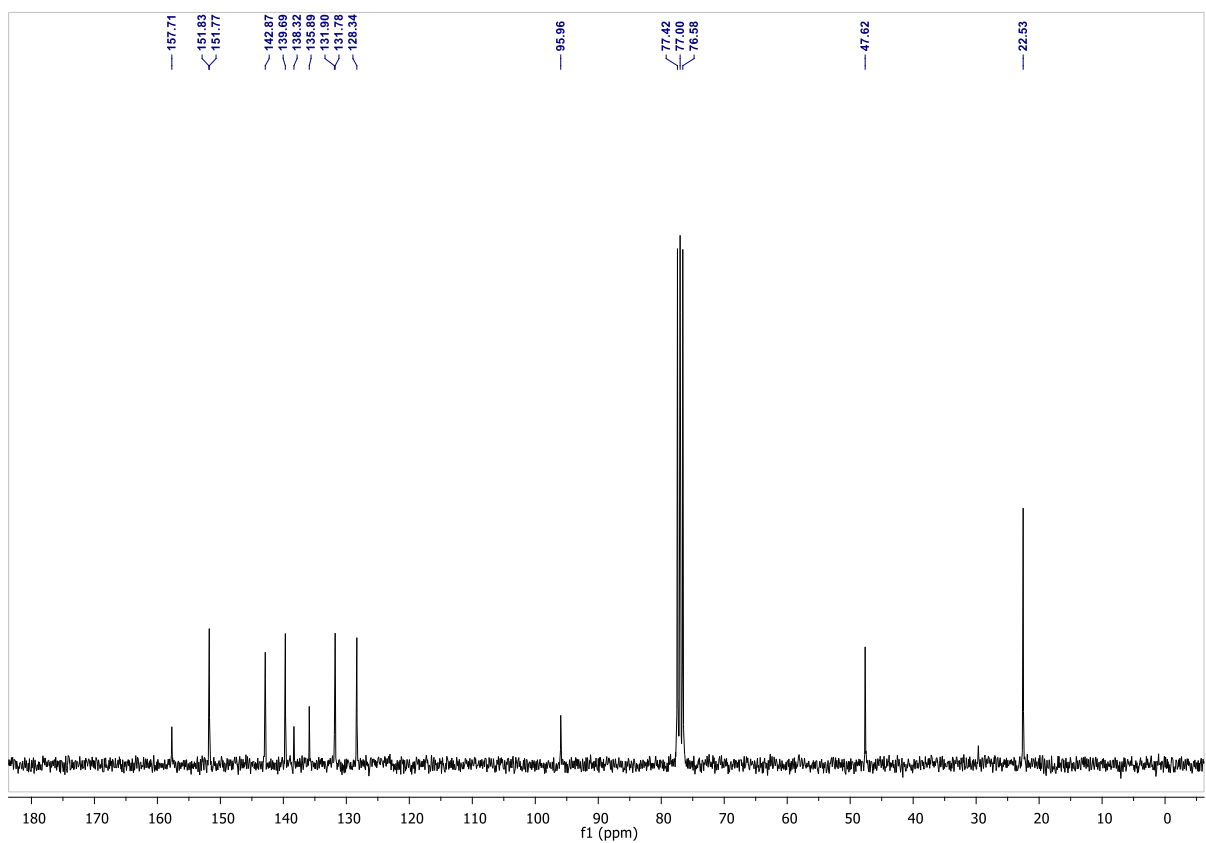

# 6-(4-Fluoro-2-iodophenyl)-9-isopropyl-9H-purine (3n)

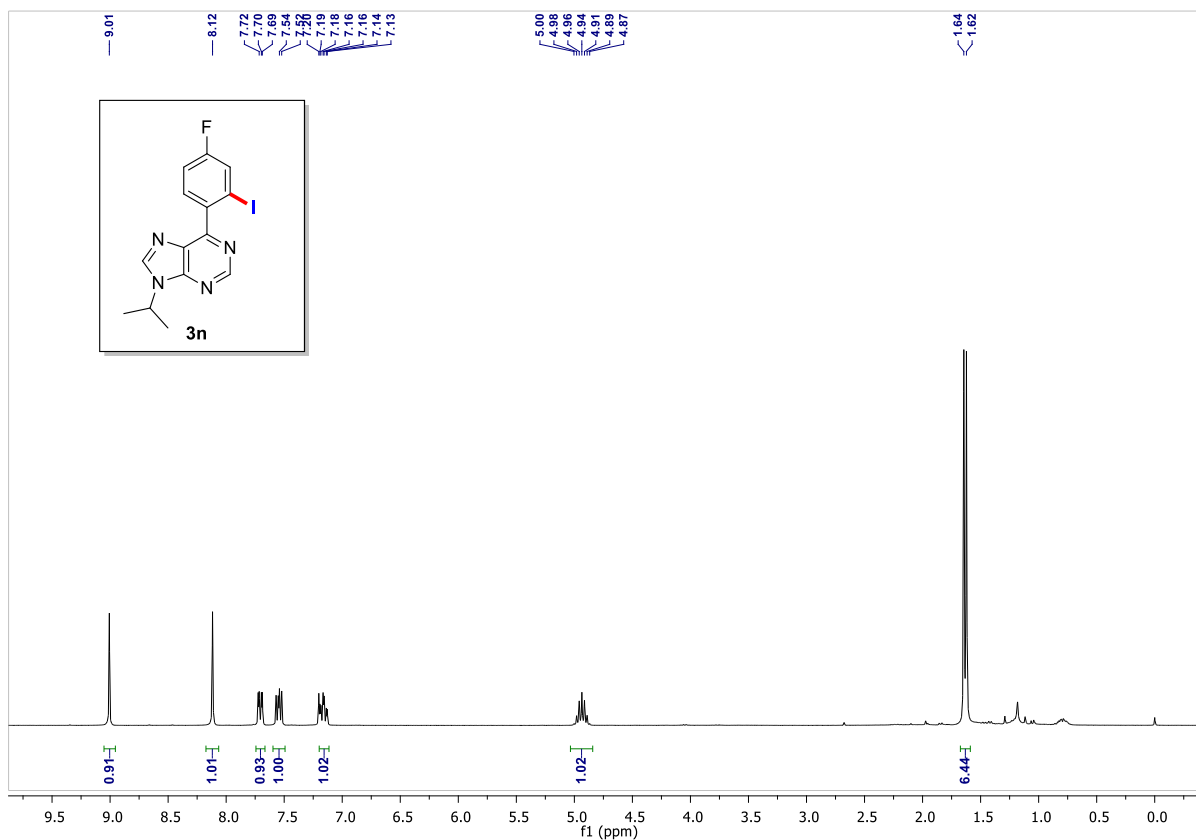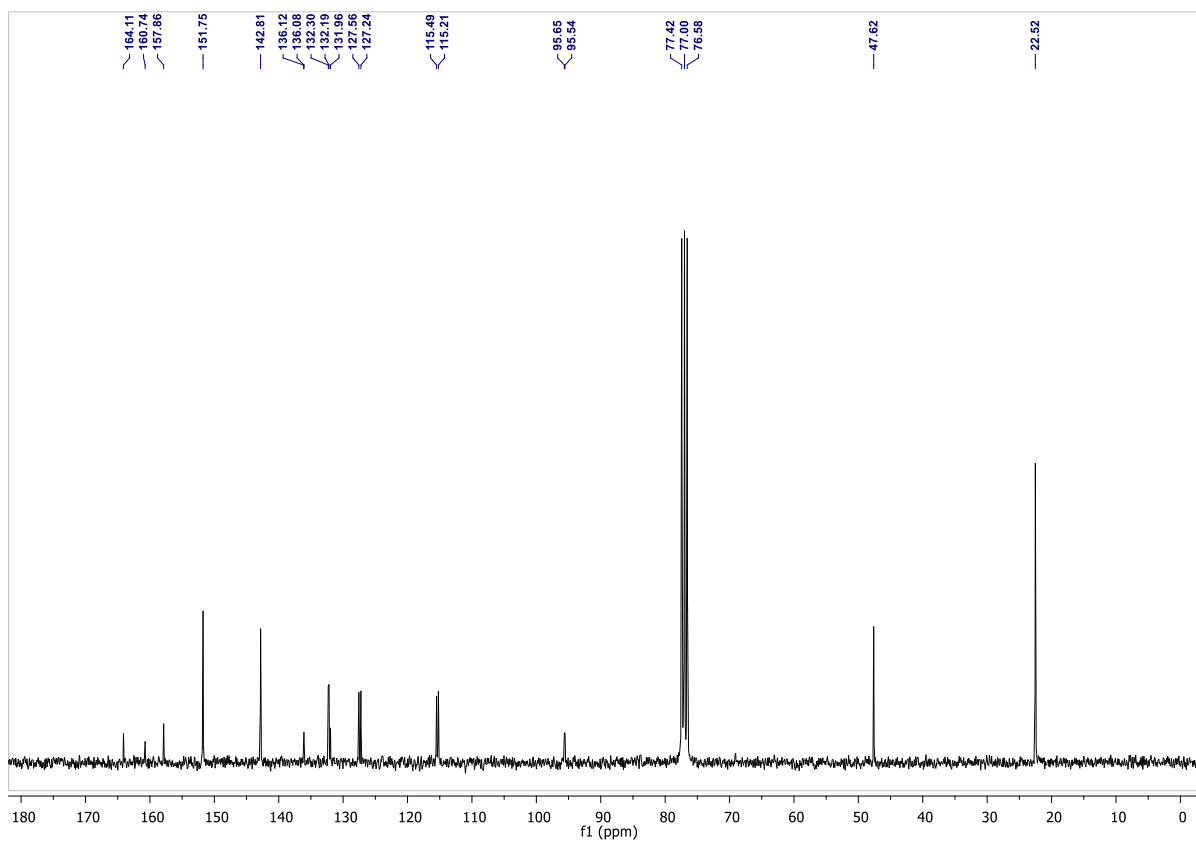



# 1-[3-iodo-4-(9-isopropyl-9H-purin-6-yl)phenyl]ethanone (3o)

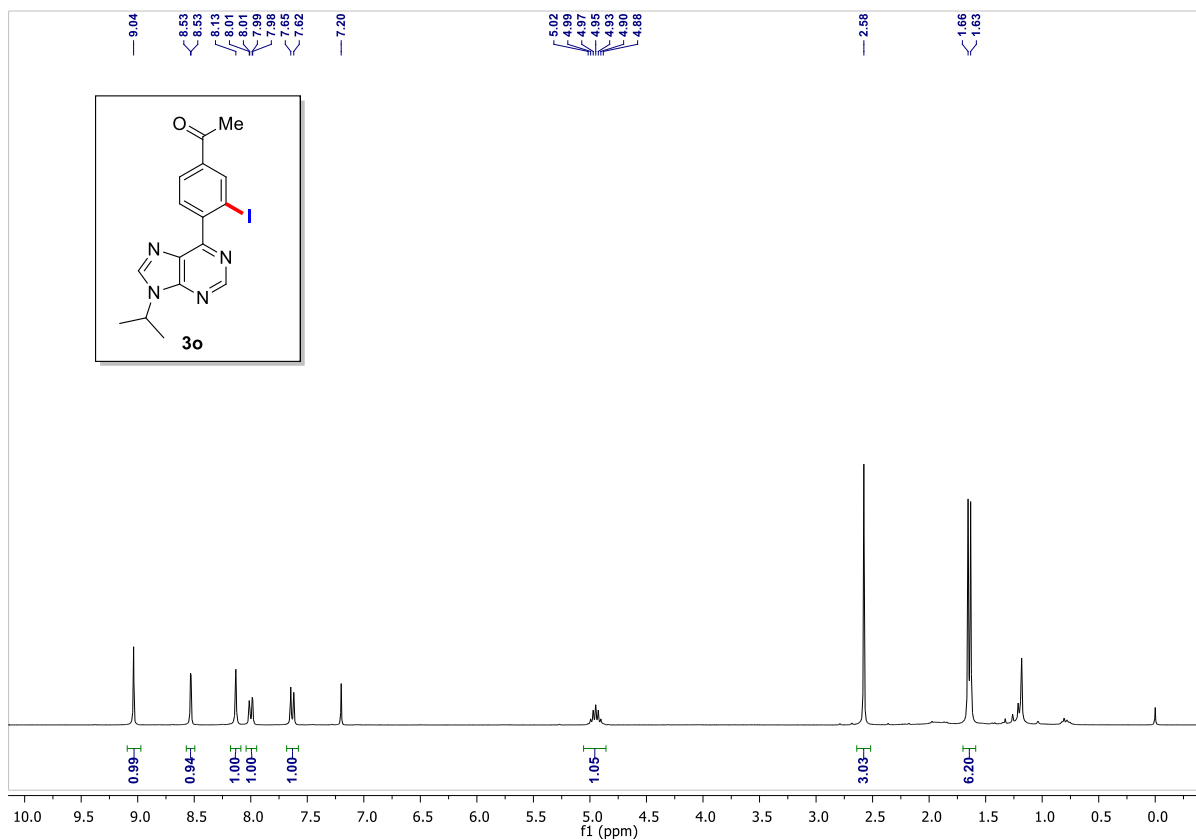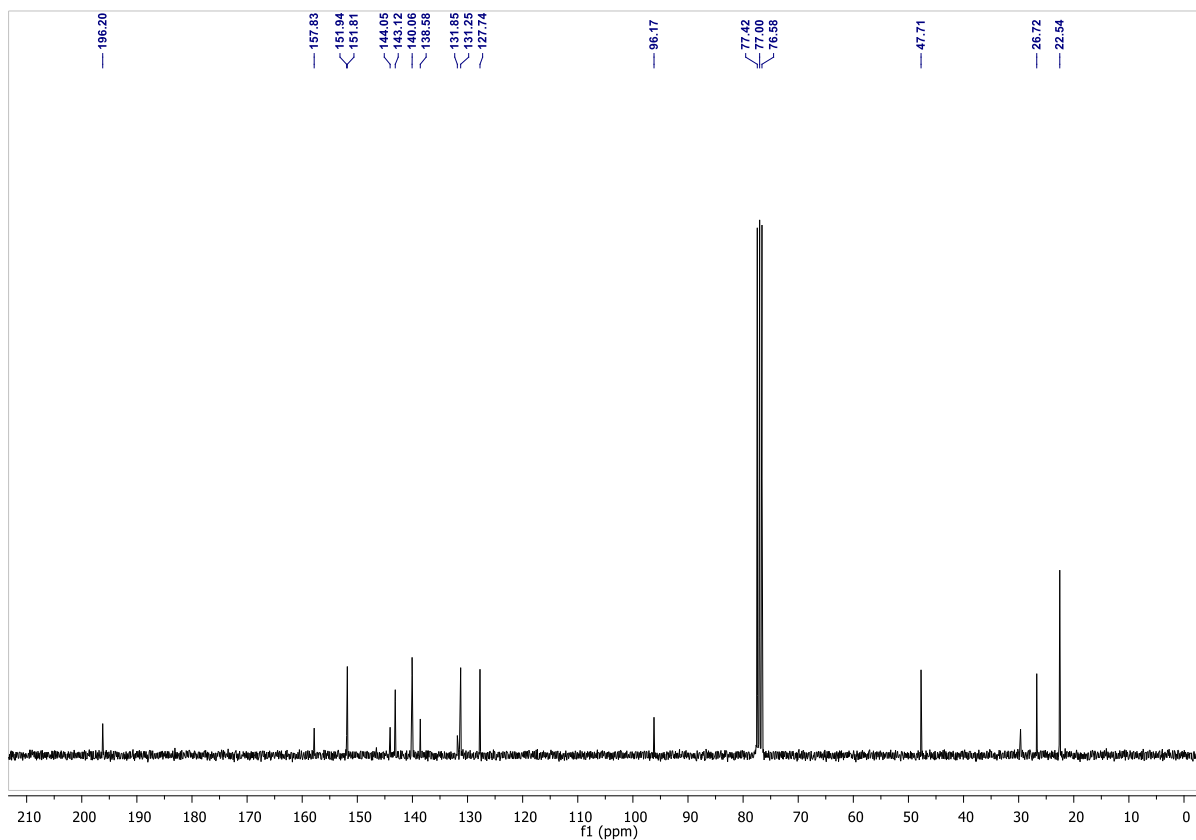

# 4-(9-Butyl-9H-purin-6-yl)-3-iodobenzaldehyde (3p)

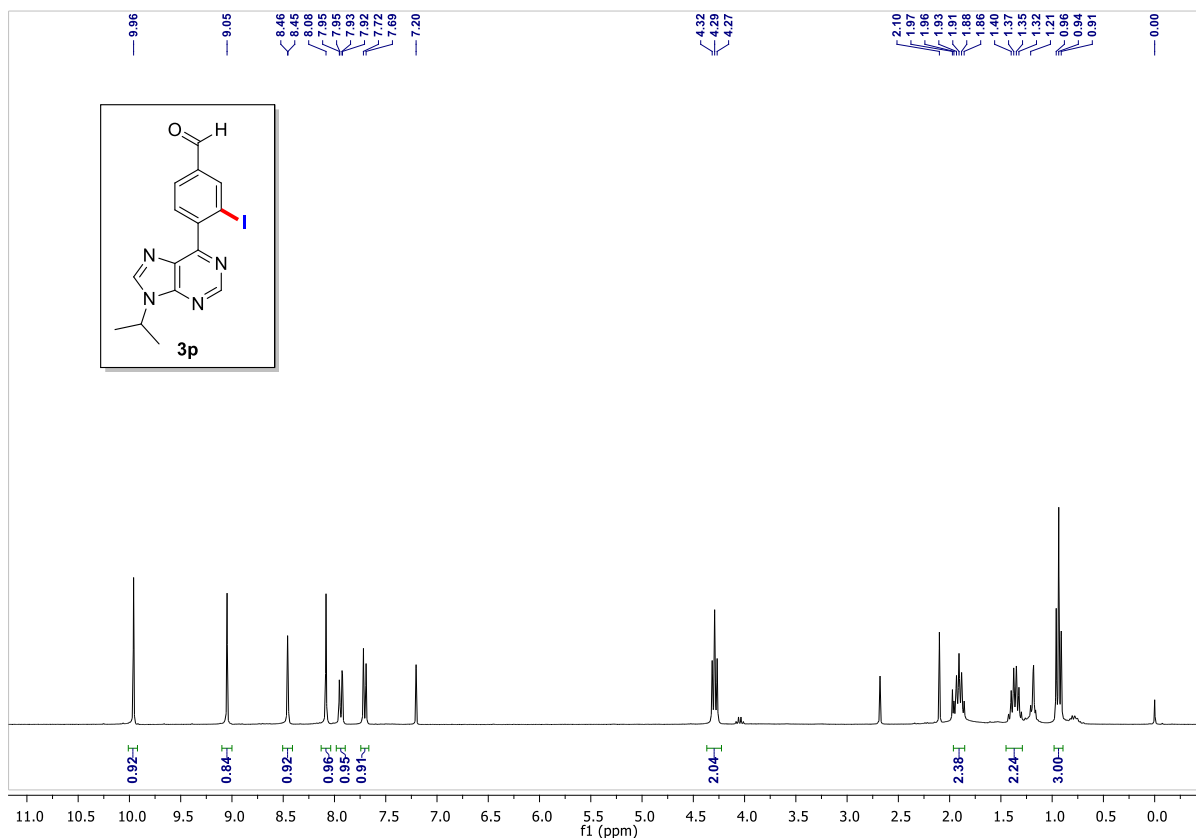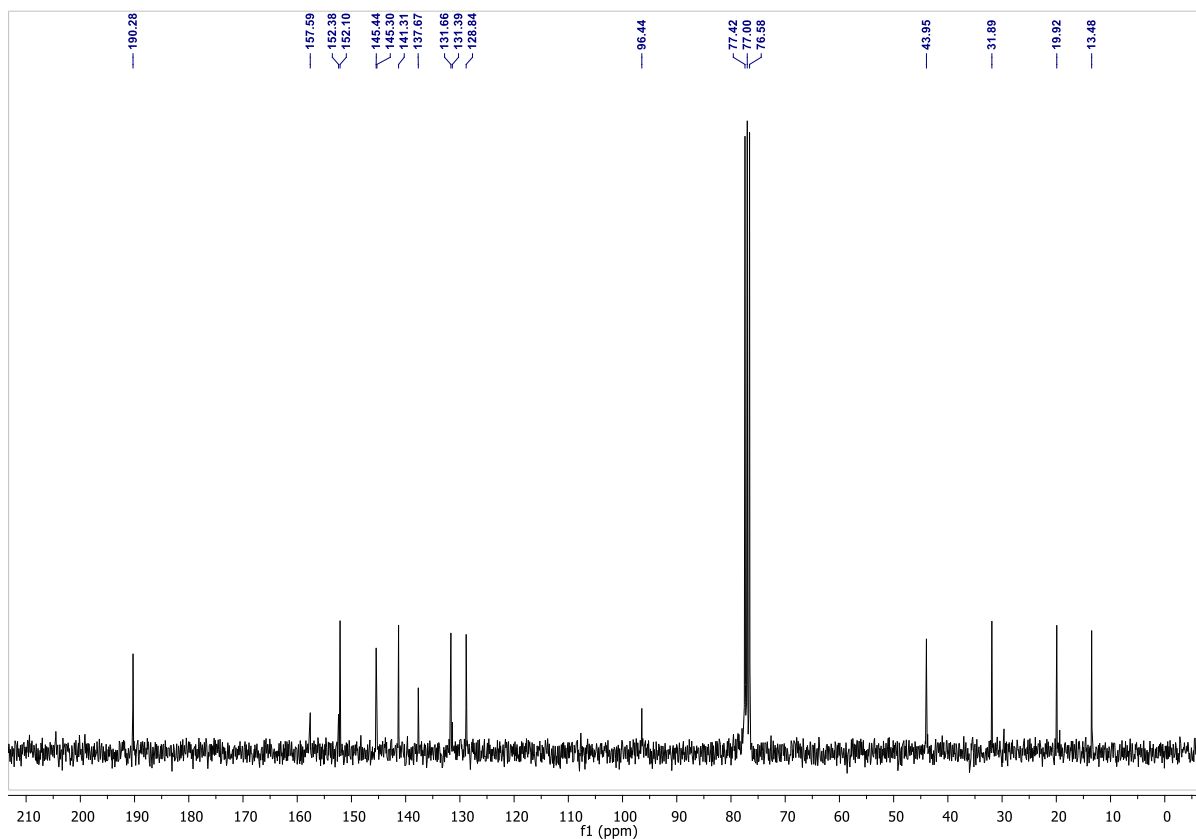

# Methyl 3-iodo-4-(9-isopropyl-9H-purin-6-yl)benzoate (3q)

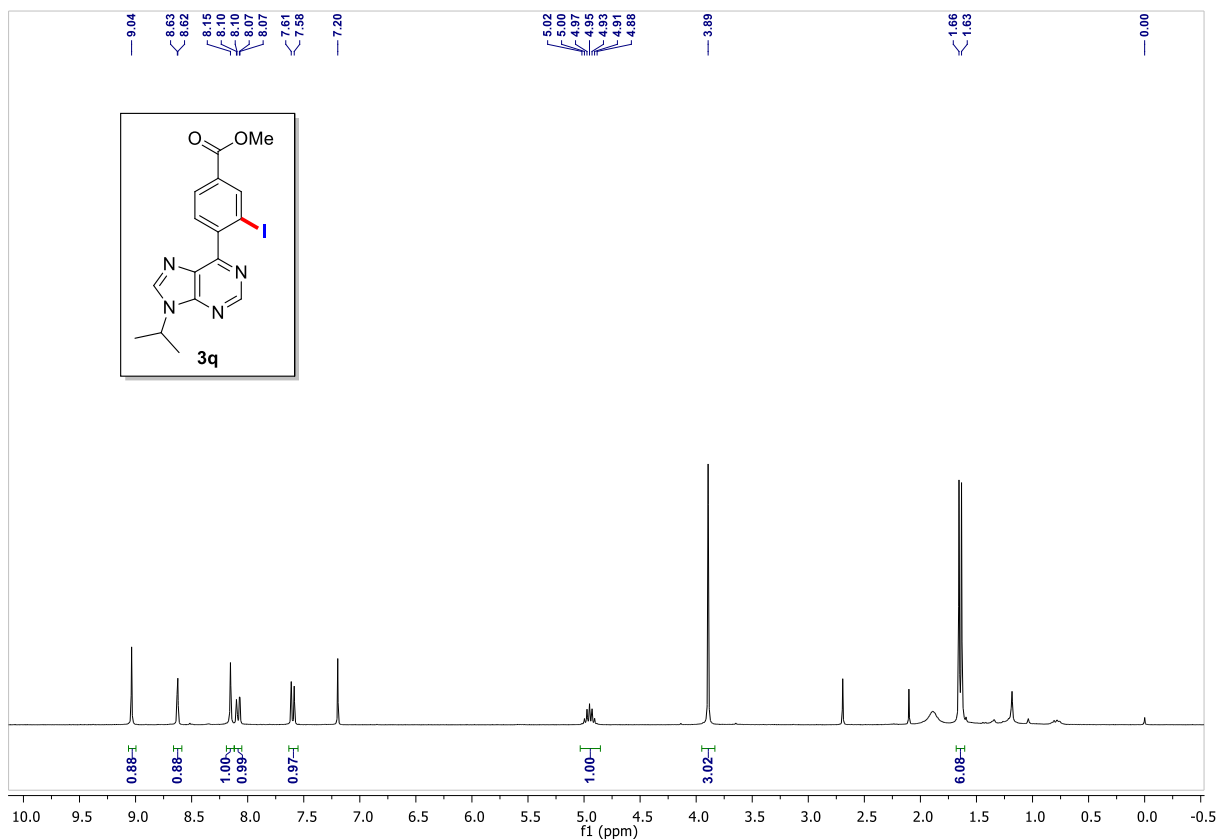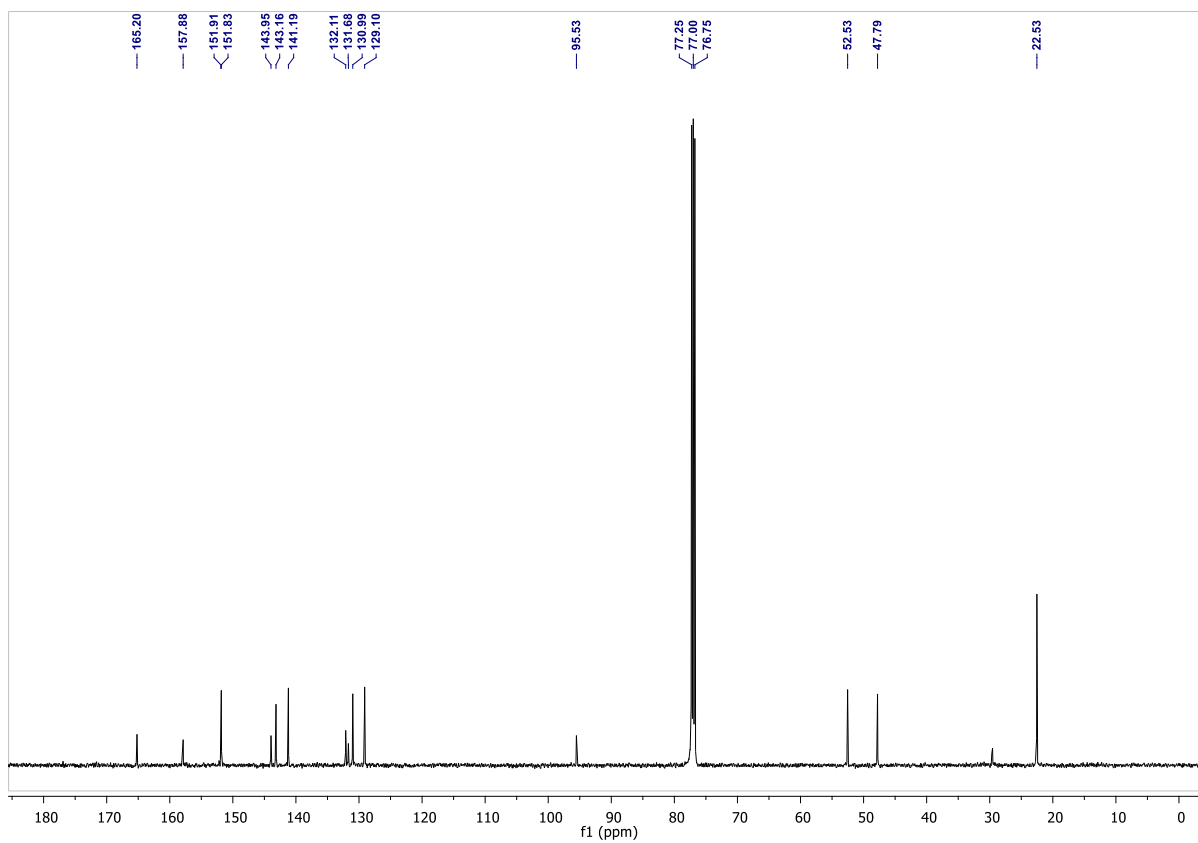

**(E)-Ethyl 3-(4-(9-butyl-9H-purin-6-yl)-3-iodophenyl)acrylate (3s)**

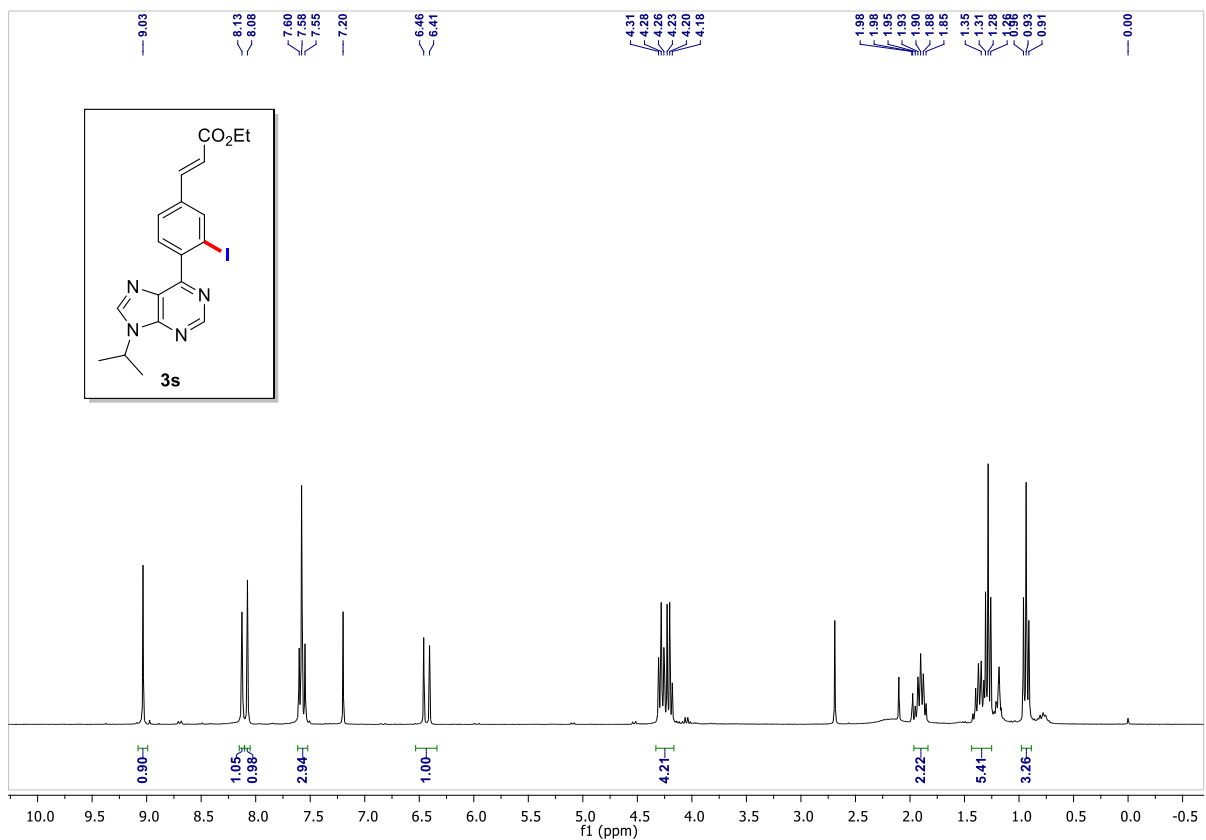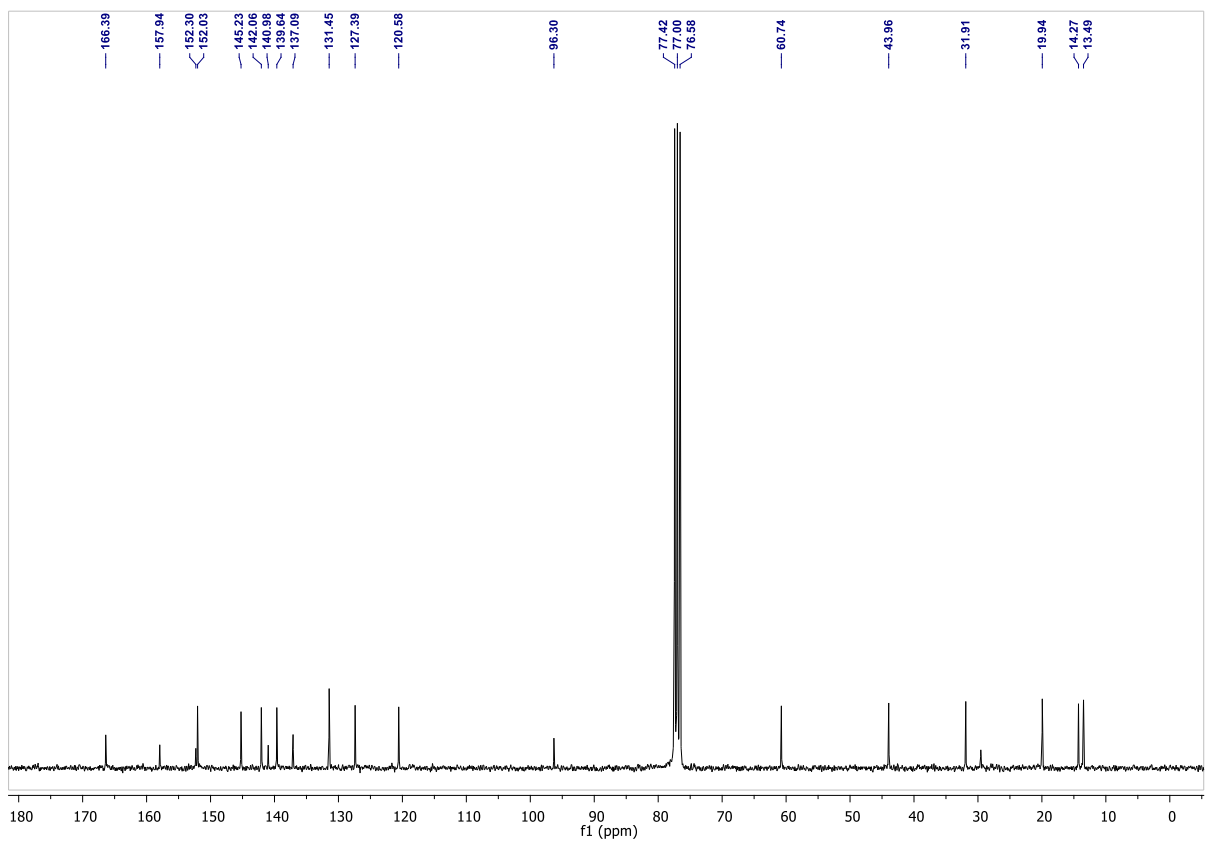

# 6-(5-Chloro-2-iodophenyl)-9-isopropyl-9H-purine (3t)

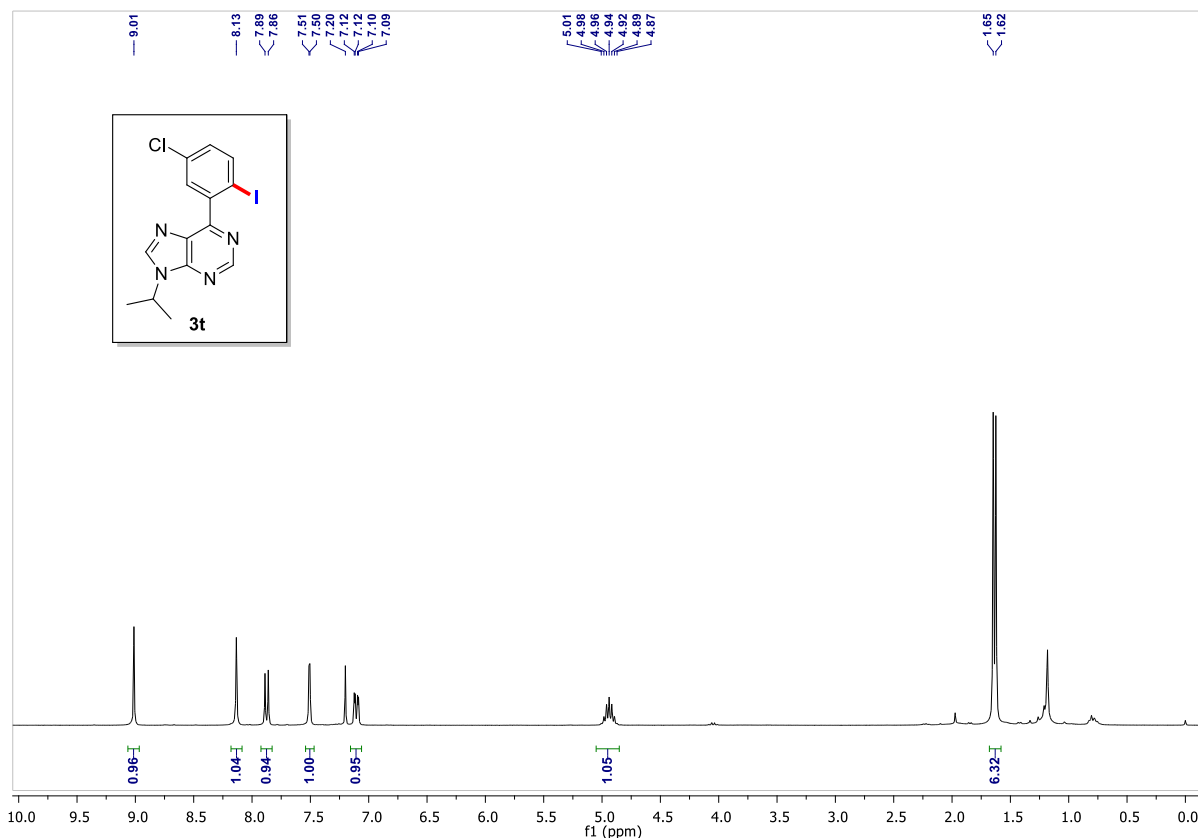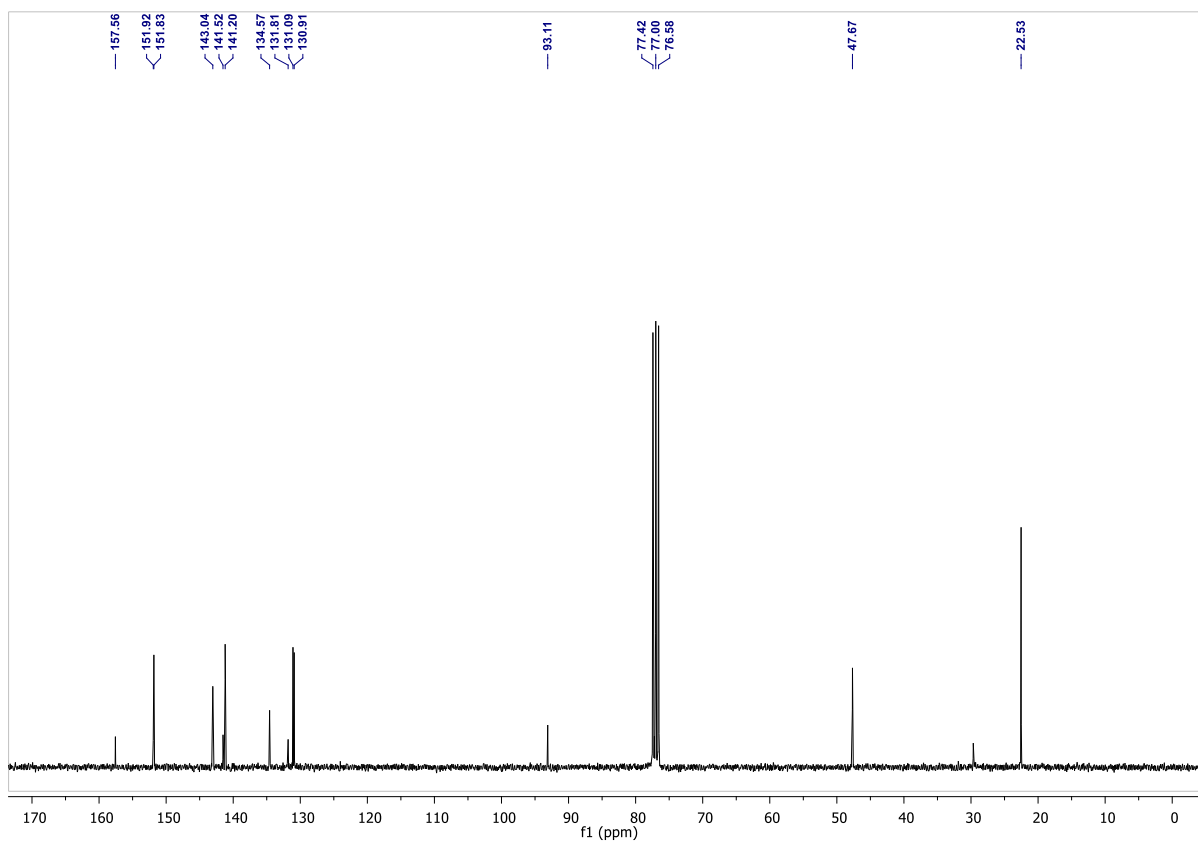

# 1-[4-Iodo-3-(9-isopropyl-9H-purin-6-yl)phenyl]ethanone (3u)

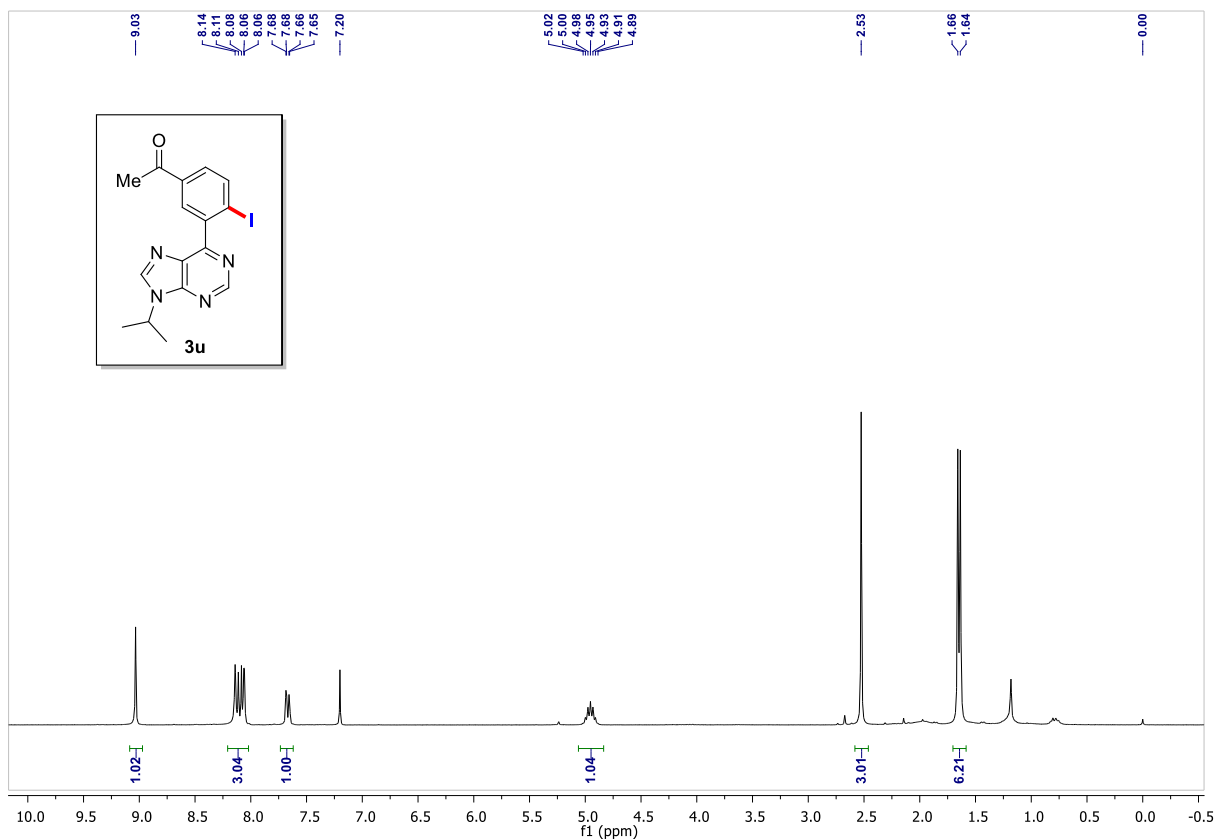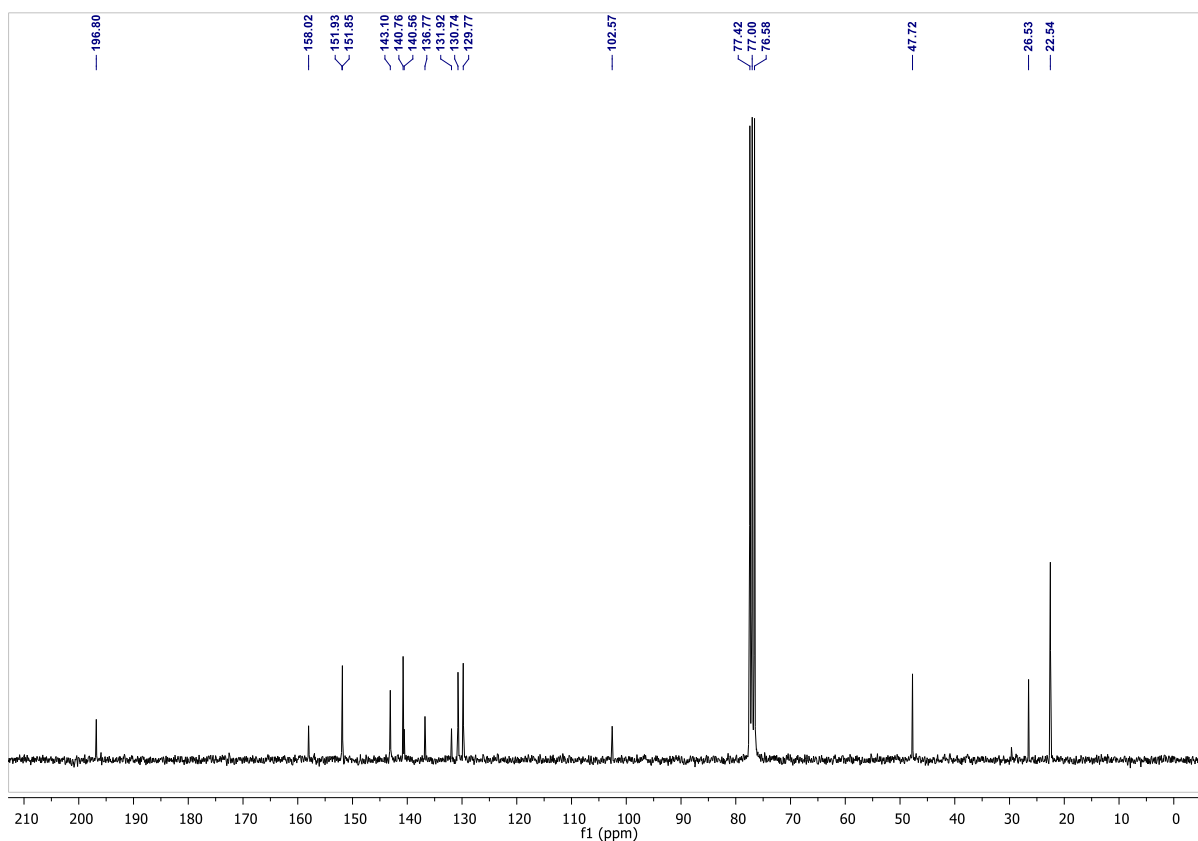

# 6-(2-Iodo-5-methoxyphenyl)-9-isopropyl-9H-purine (3v)

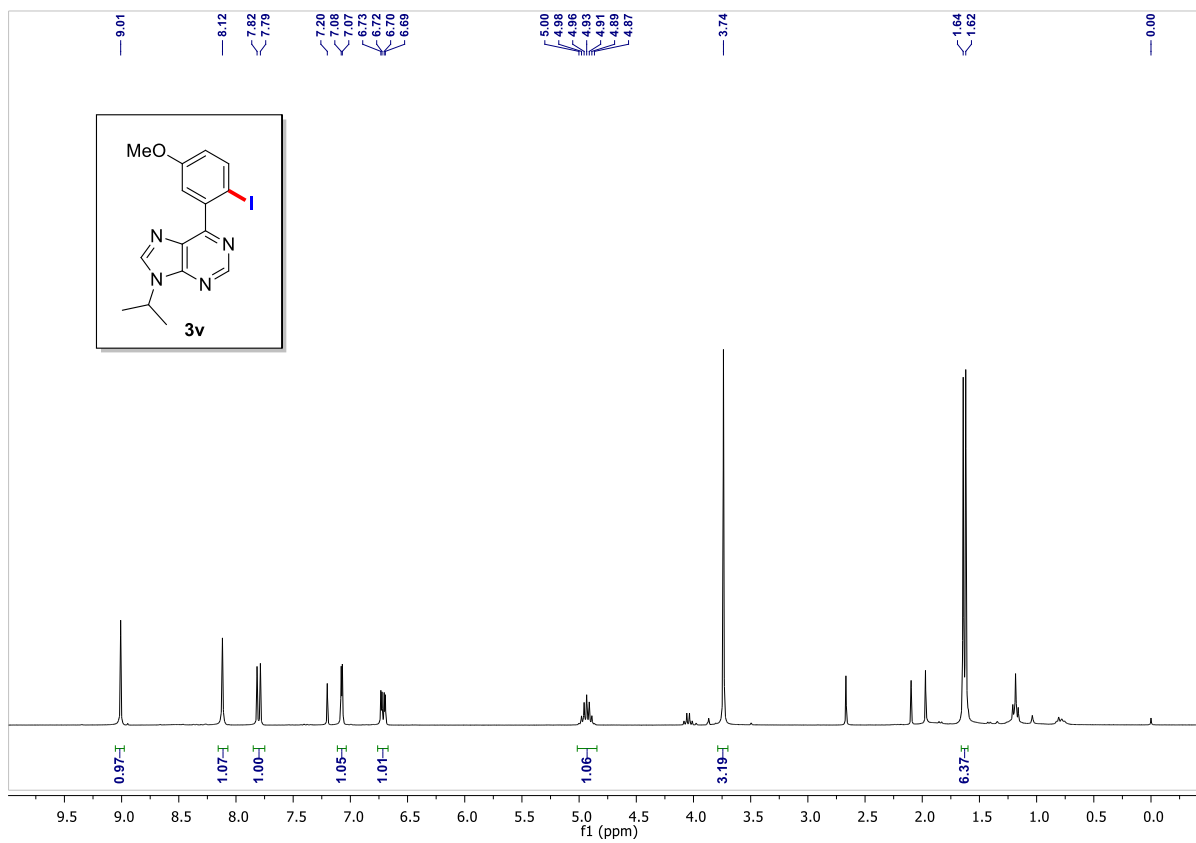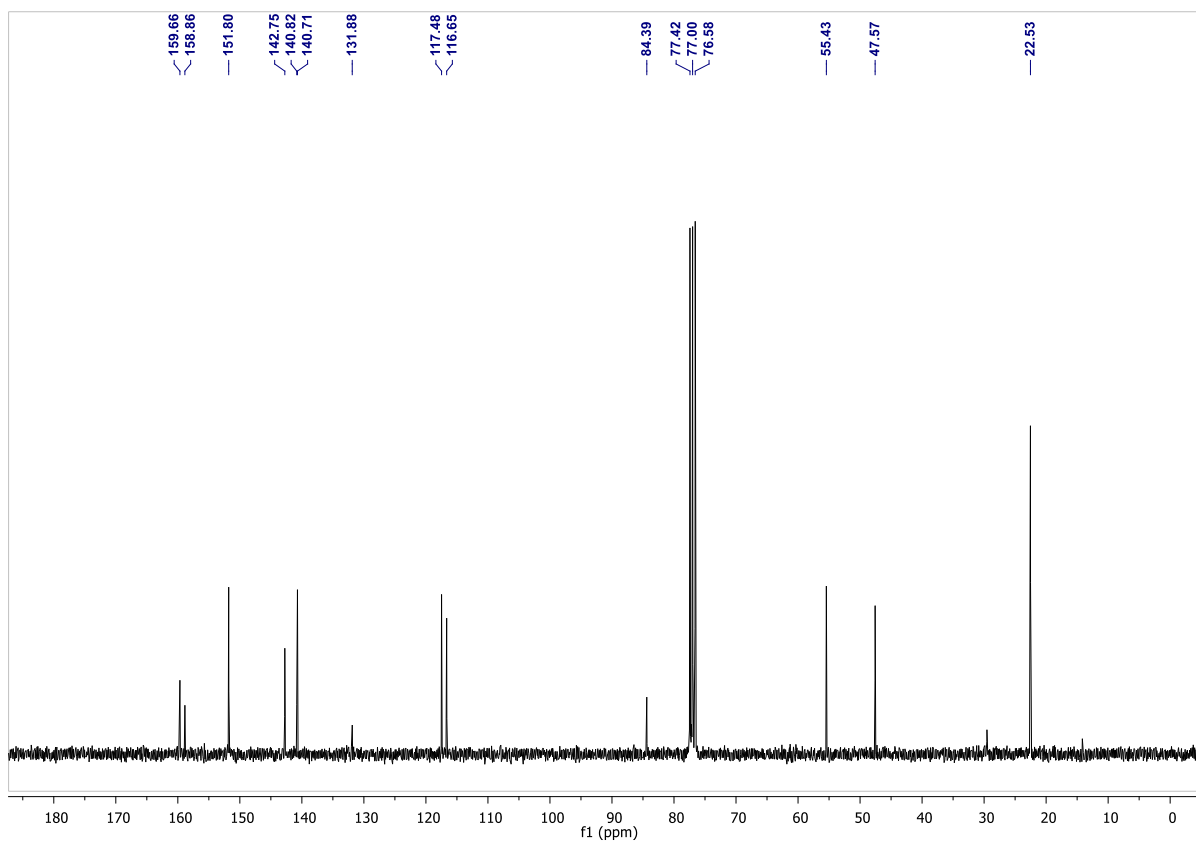

# 6-(3-Iodonaphthalen-2-yl)-9-isopropyl-9H-purine (3x)

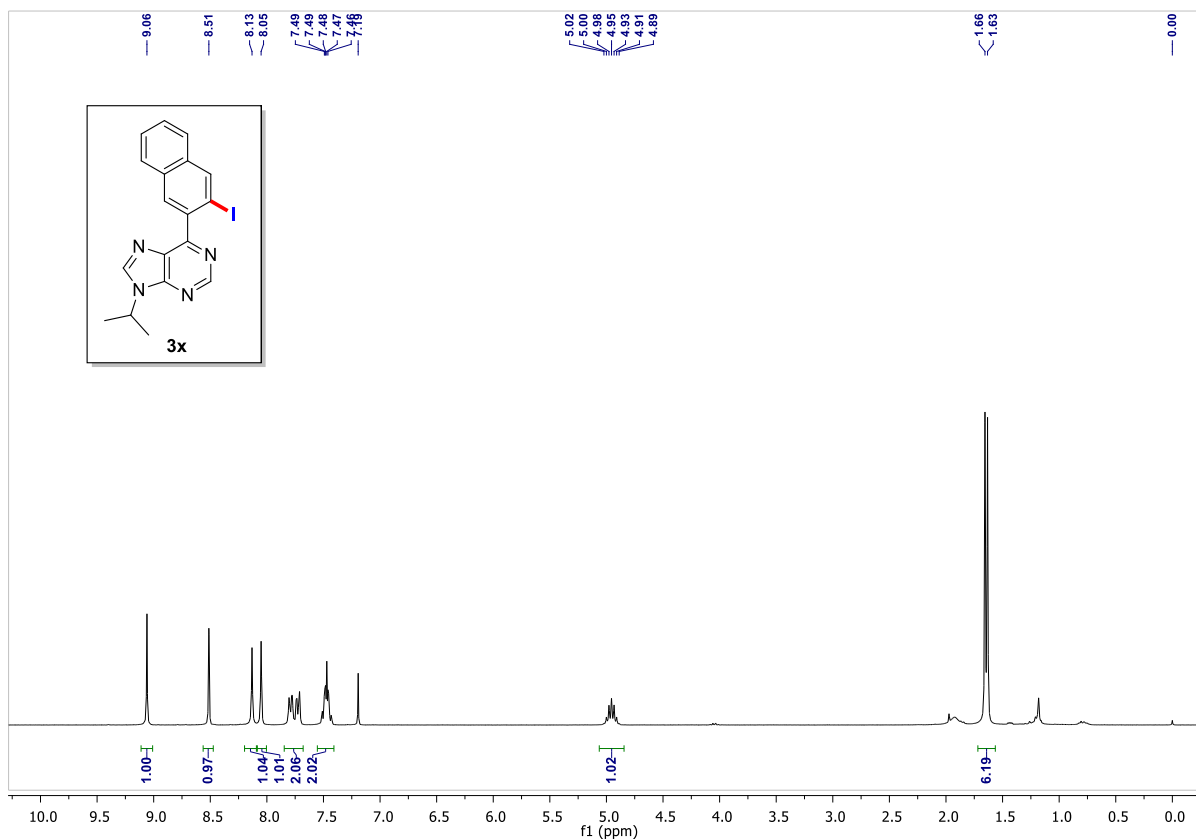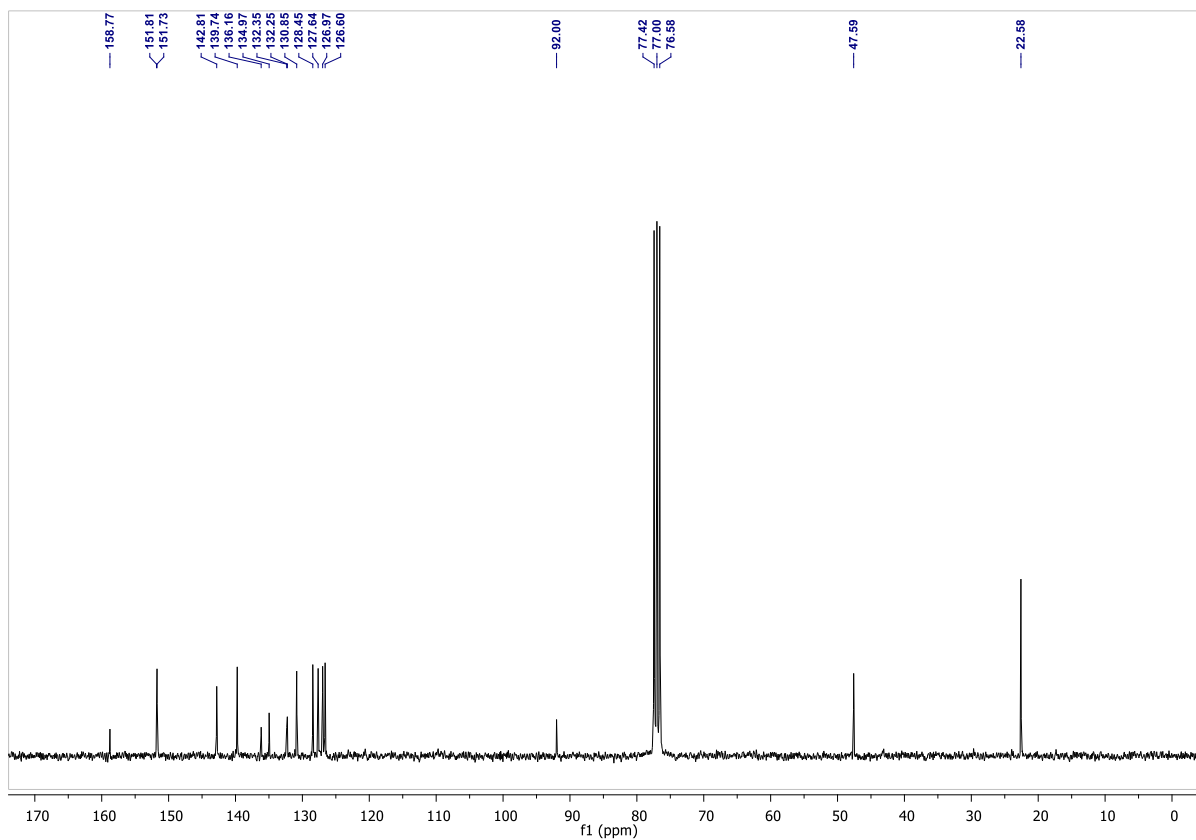



# 6-(2-Bromophenyl)-9-isopropyl-9H-purine (5a)

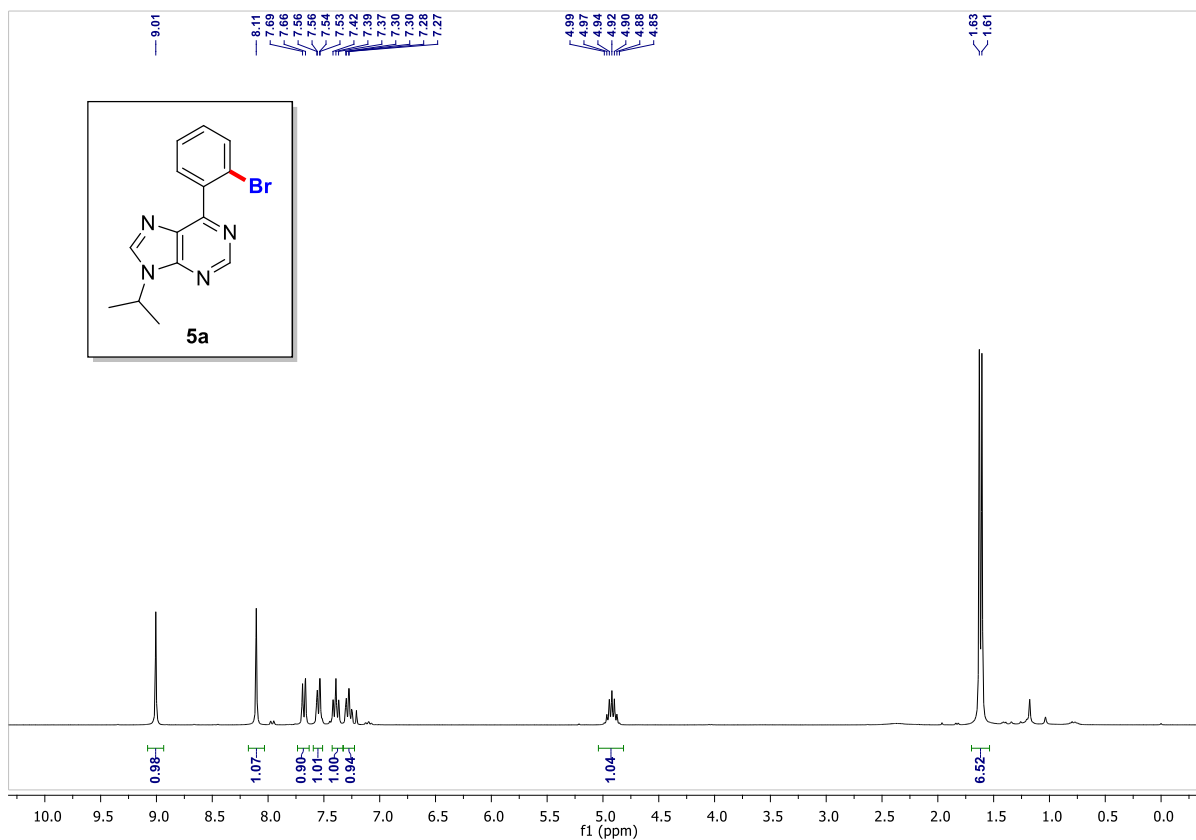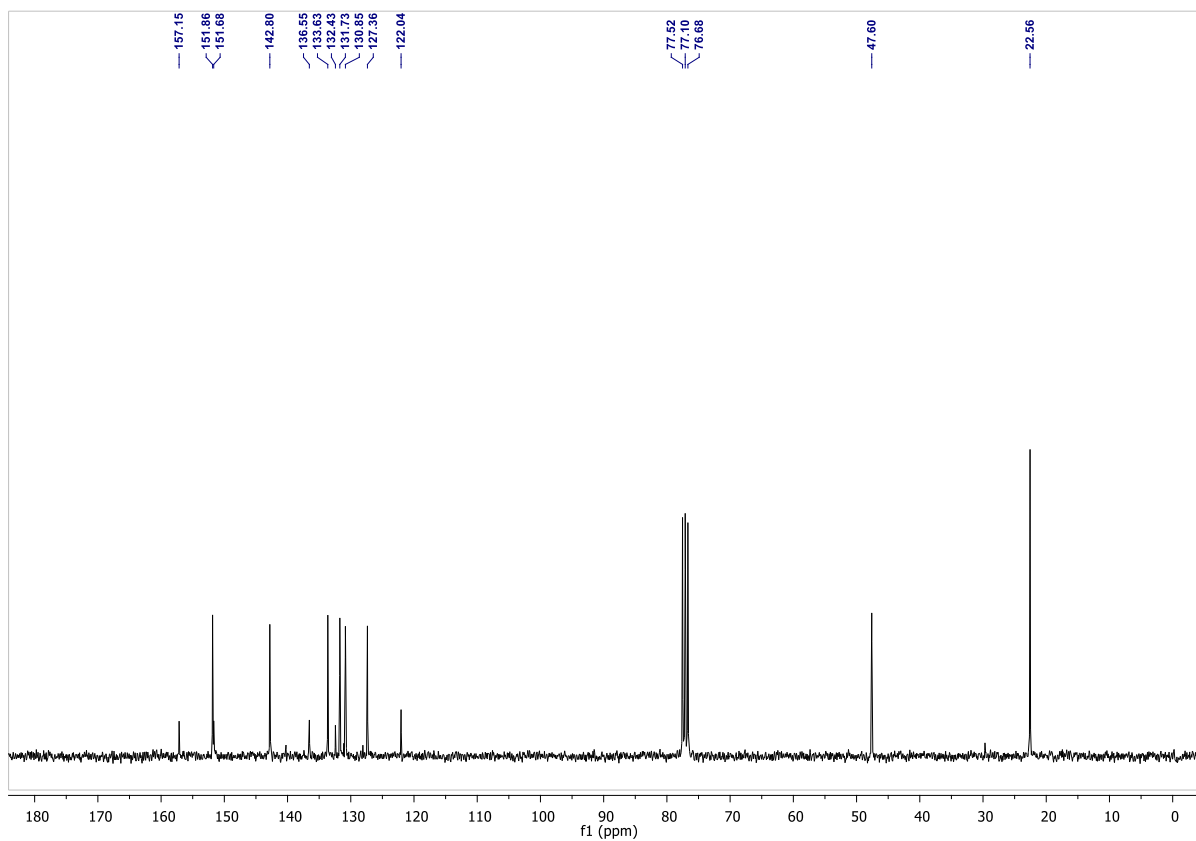

# 9-Benzyl-6-(2-bromophenyl)-9H-purine (5b)

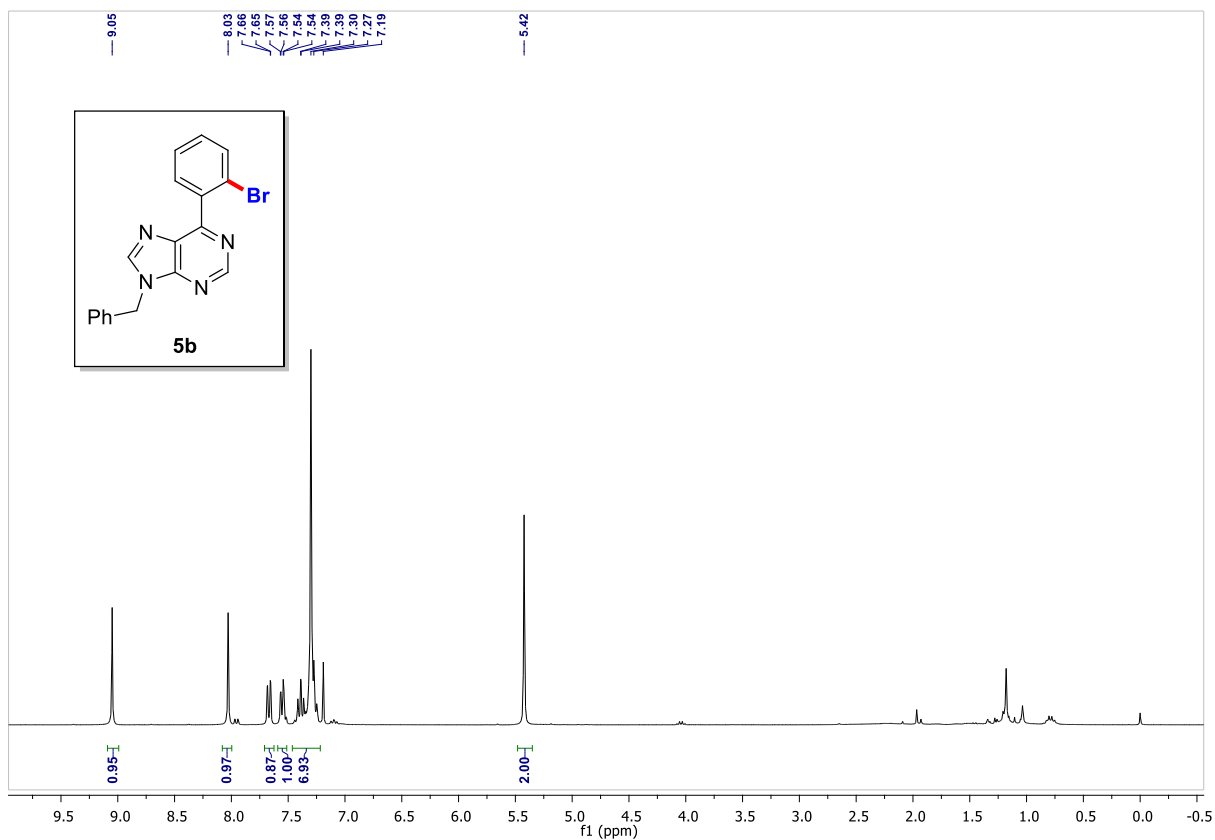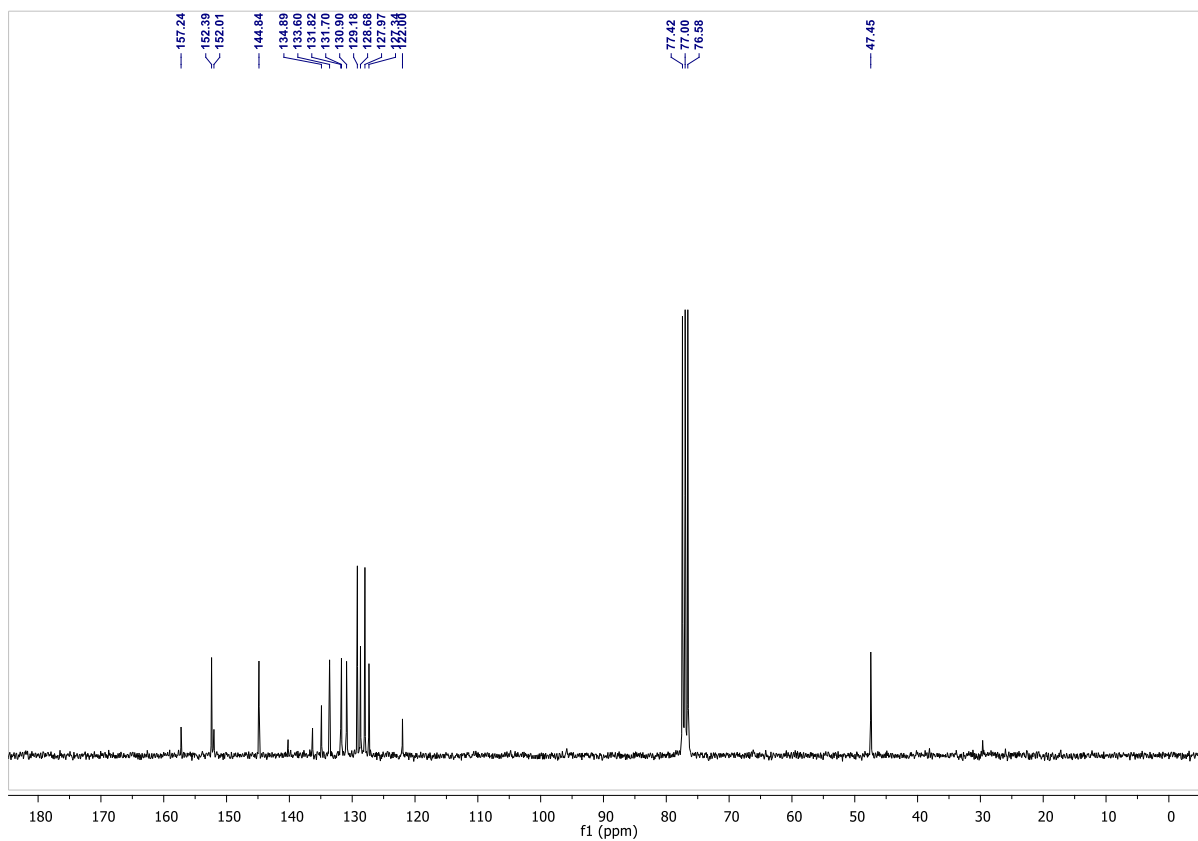

# 9-Butyl-6-(2-bromophenyl)-9H-purine (5c)

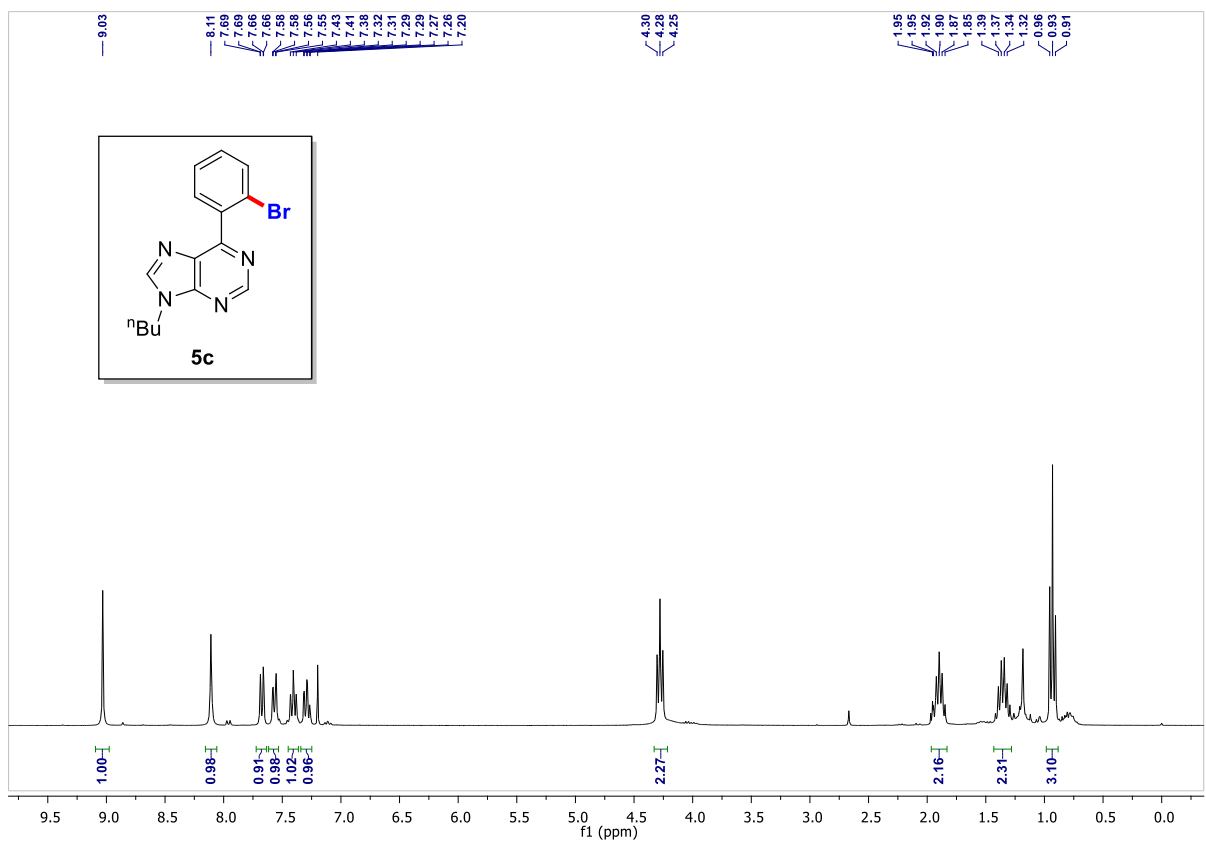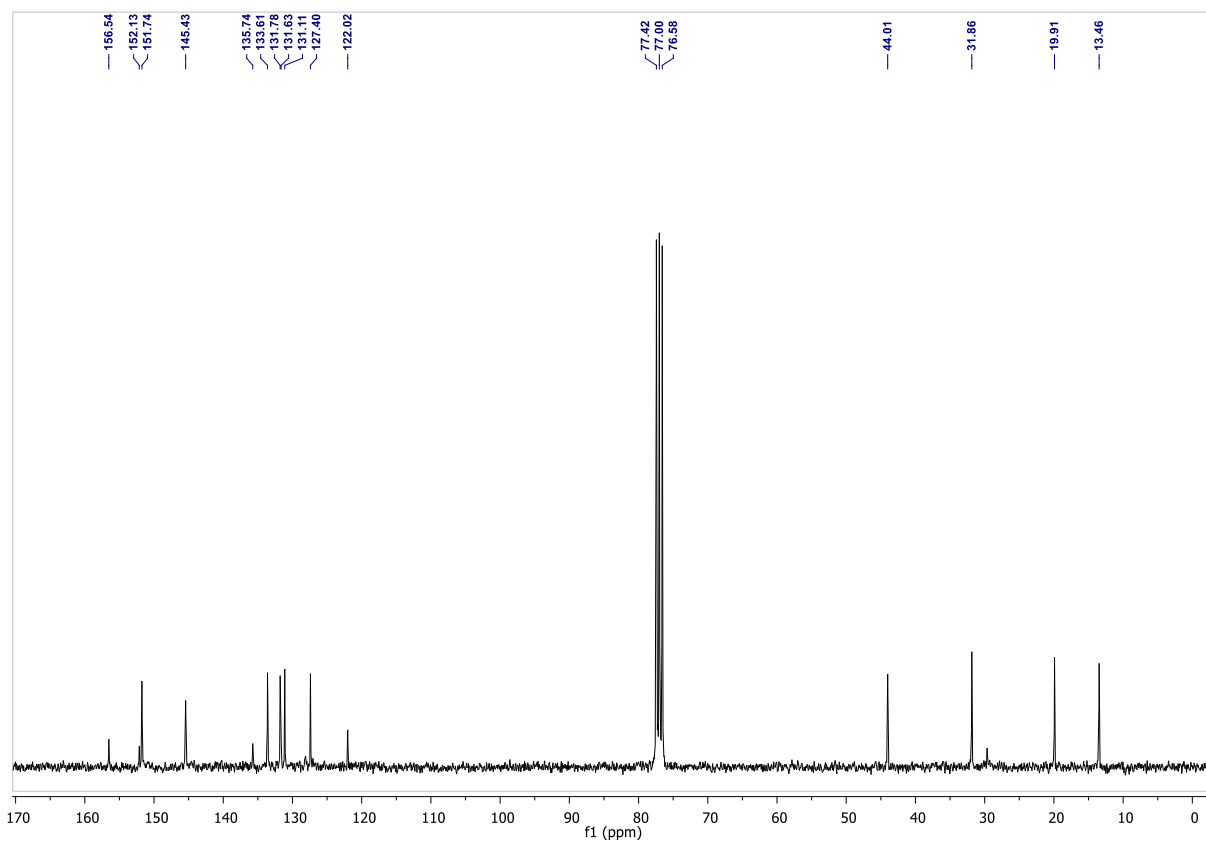

# 6-(2-Bromo-4-methylphenyl)-9-isopropyl-9H-purine (5d)

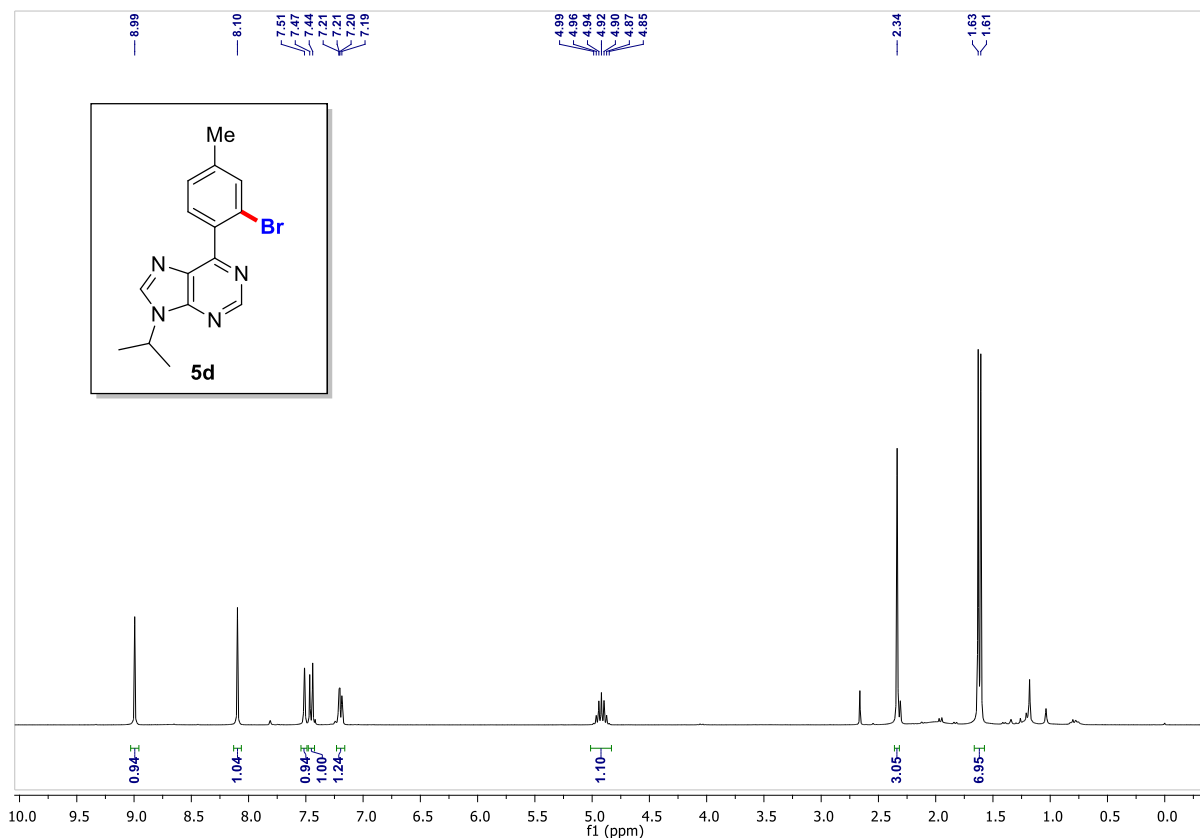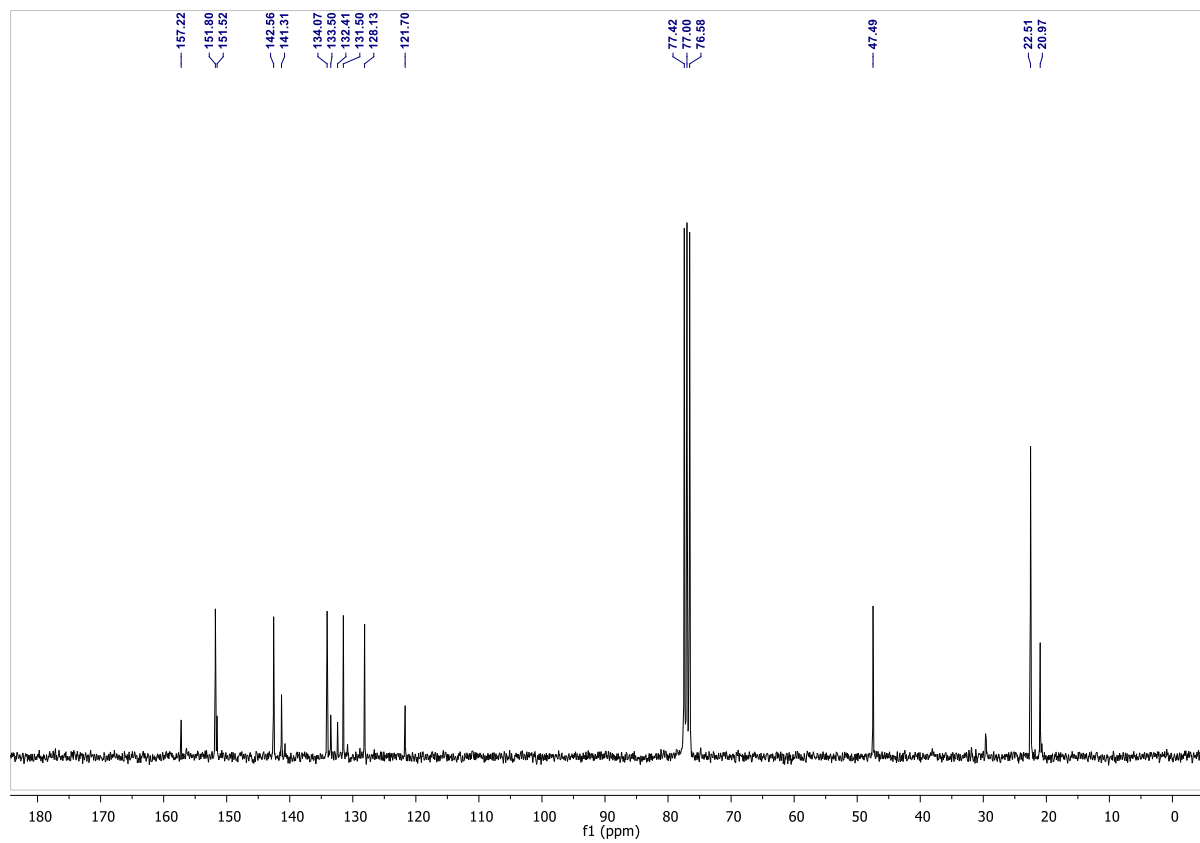

# 6-(3-Bromo-[1,1'-biphenyl]-4-yl)-9-isopropyl-9H-purine (5e)

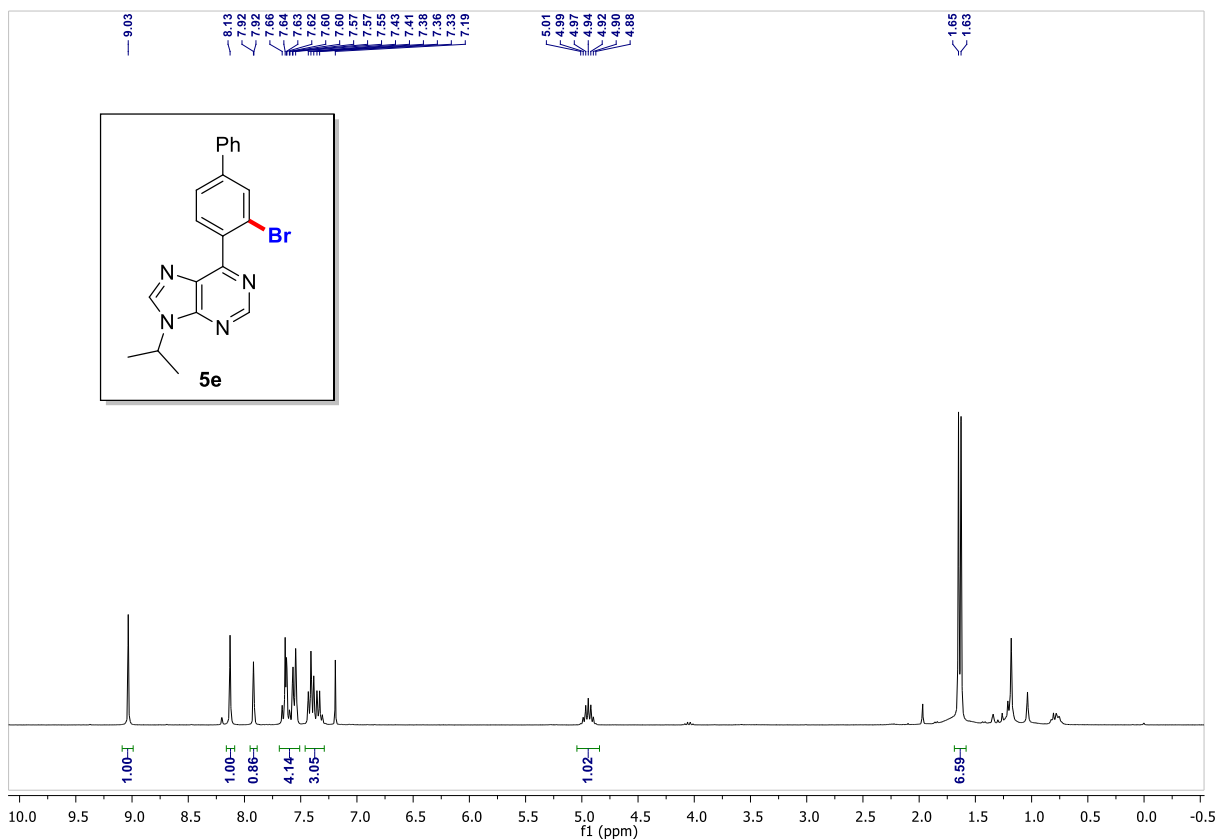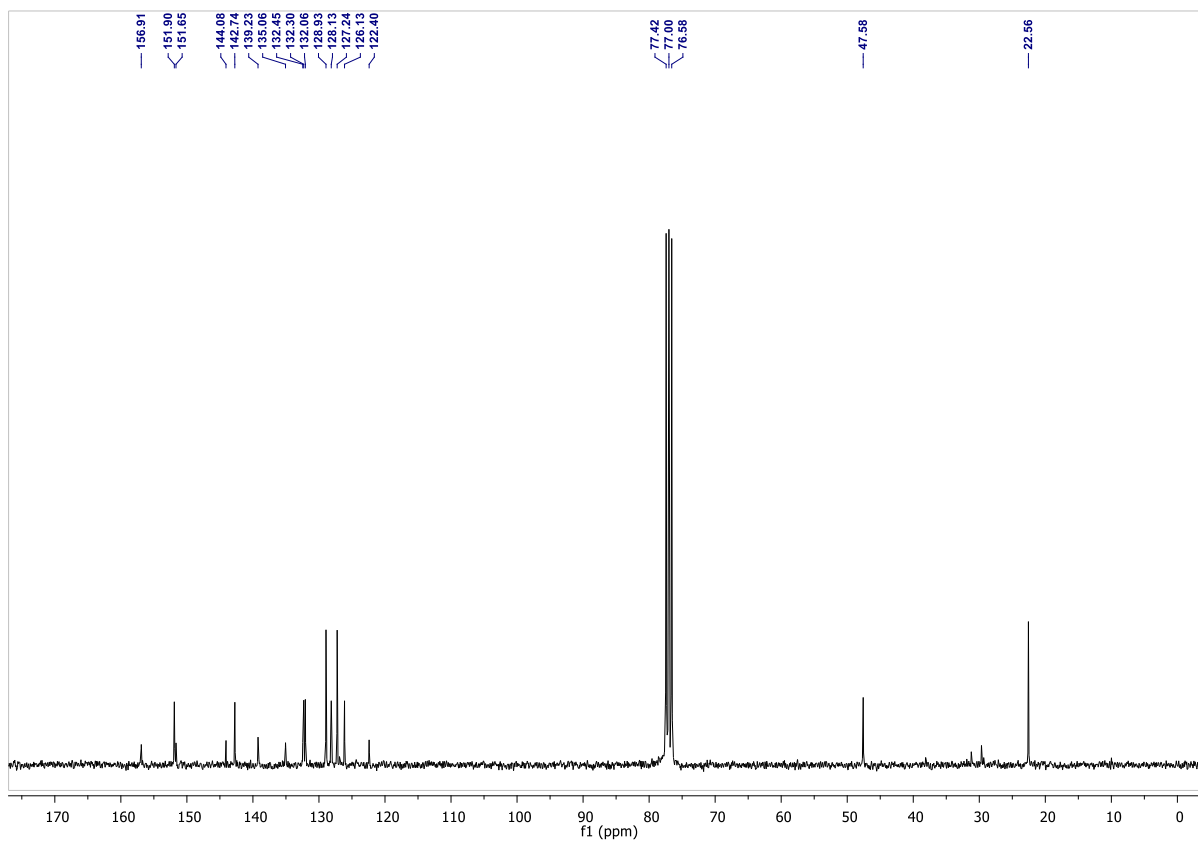

# 6-(5-Bromothiophen-2-yl)-9-isopropyl-9H-purine (7a')

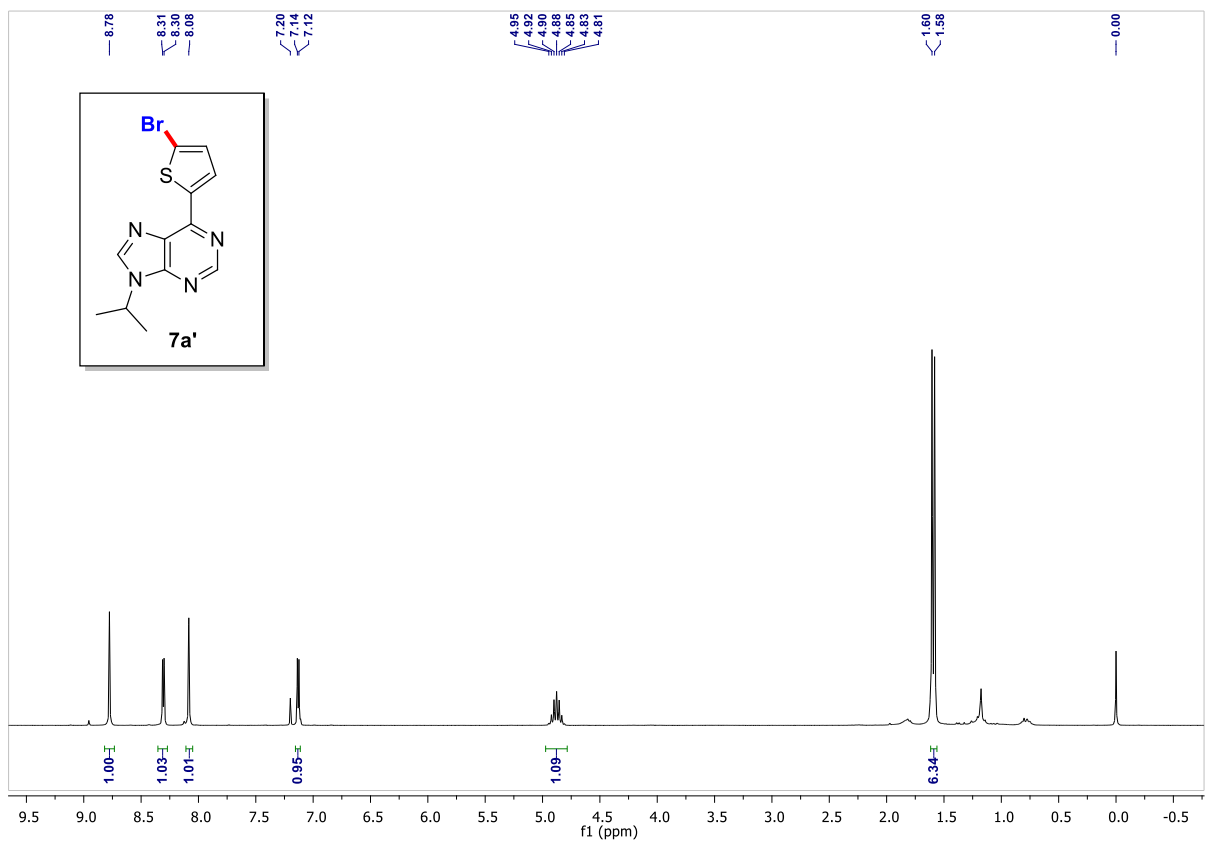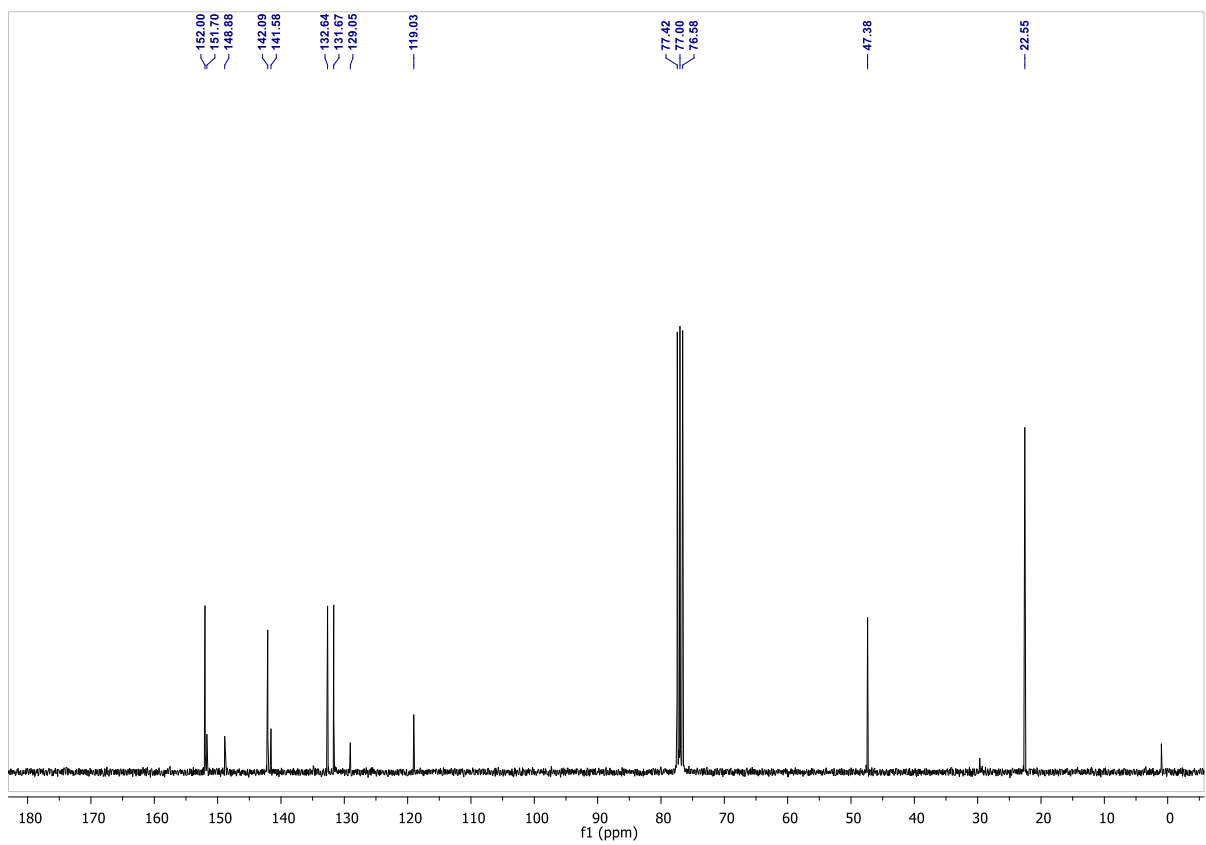

### 6-(3-Bromothiophen-2-yl)-9-isopropyl-9H-purine (7a)

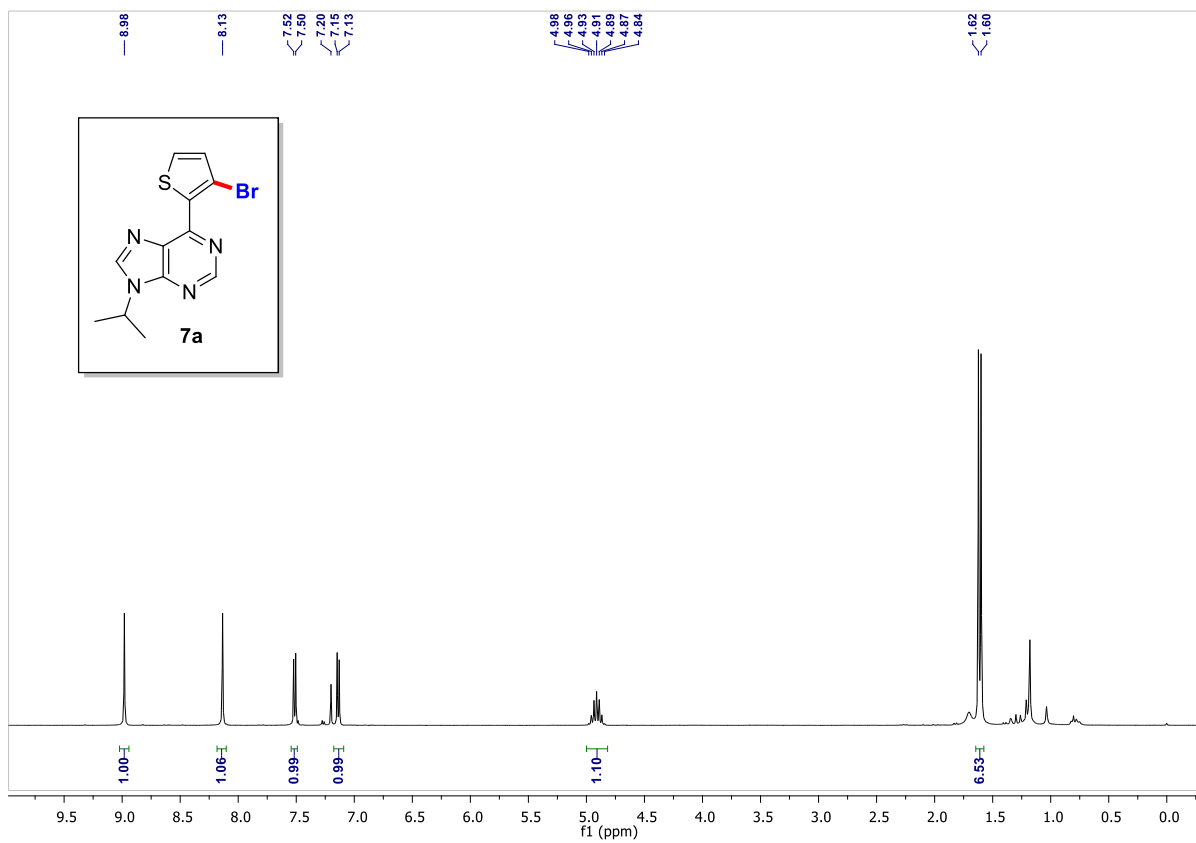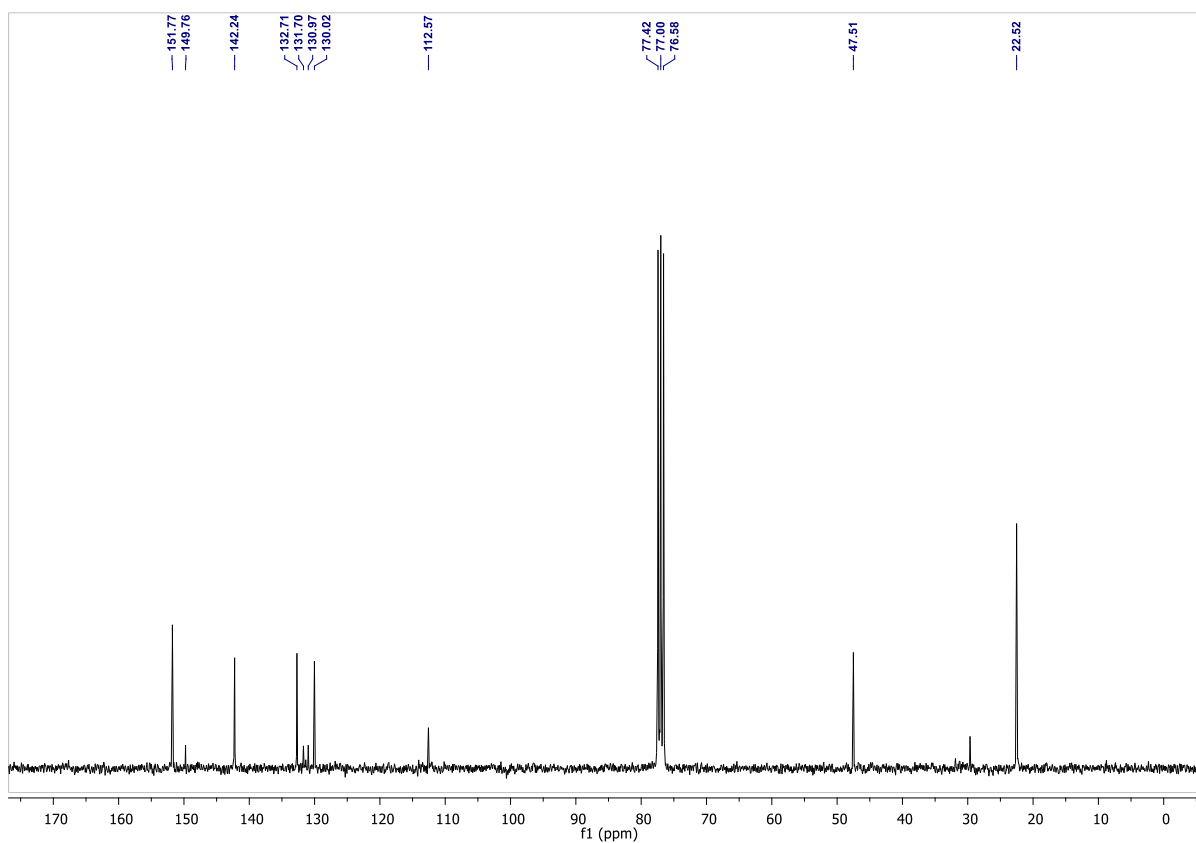

### 6-(3-Bromo-5-methylthiophen-2-yl)-9-isopropyl-9H-purine (9a)

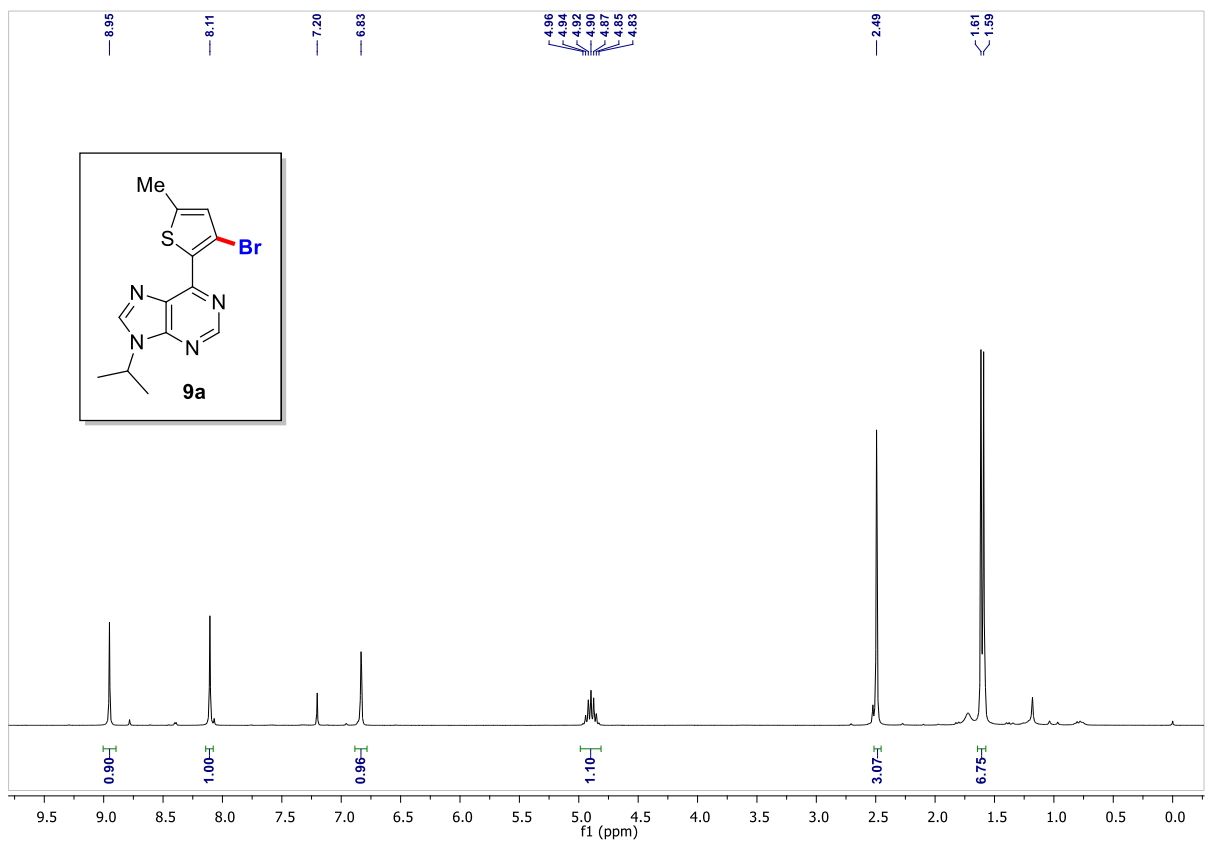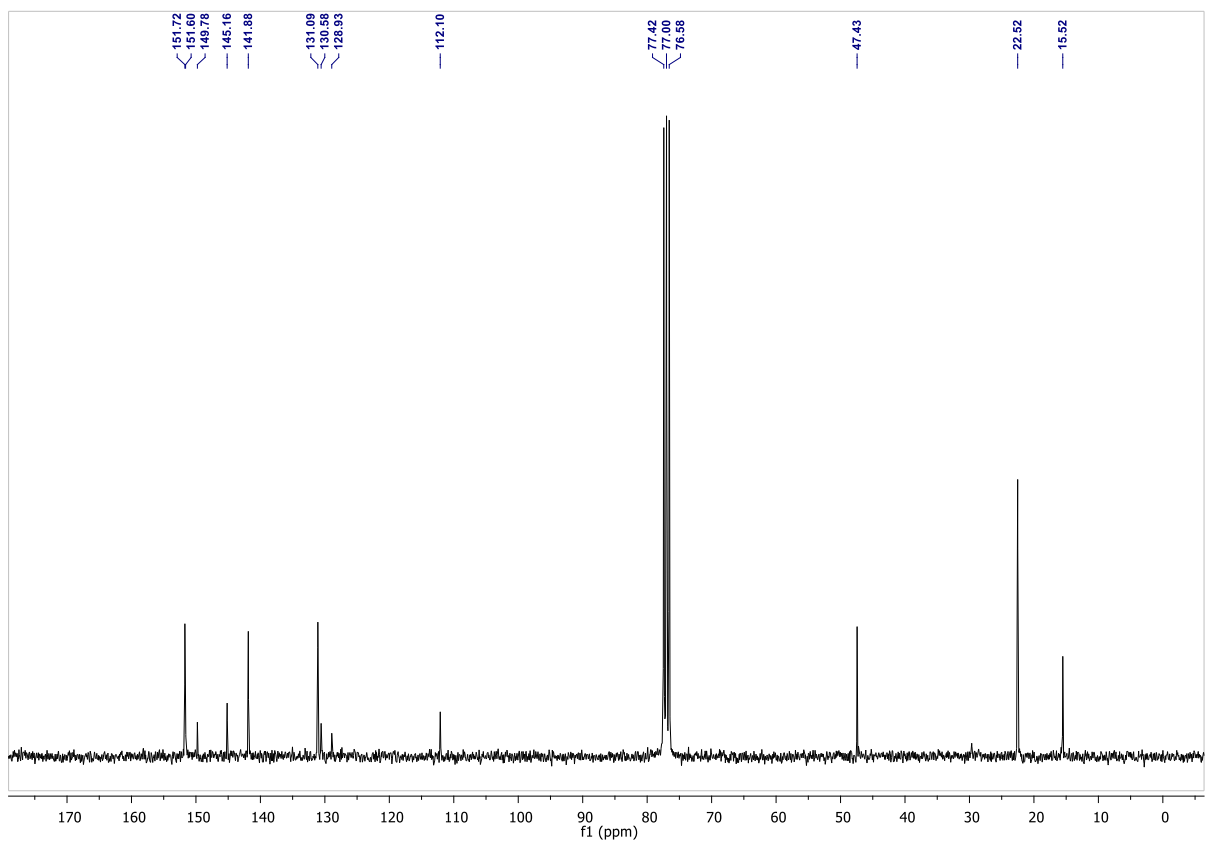



# 6-(3-Iodo-5-methylthiophen-2-yl)-9-isopropyl-9H-purine (9b)

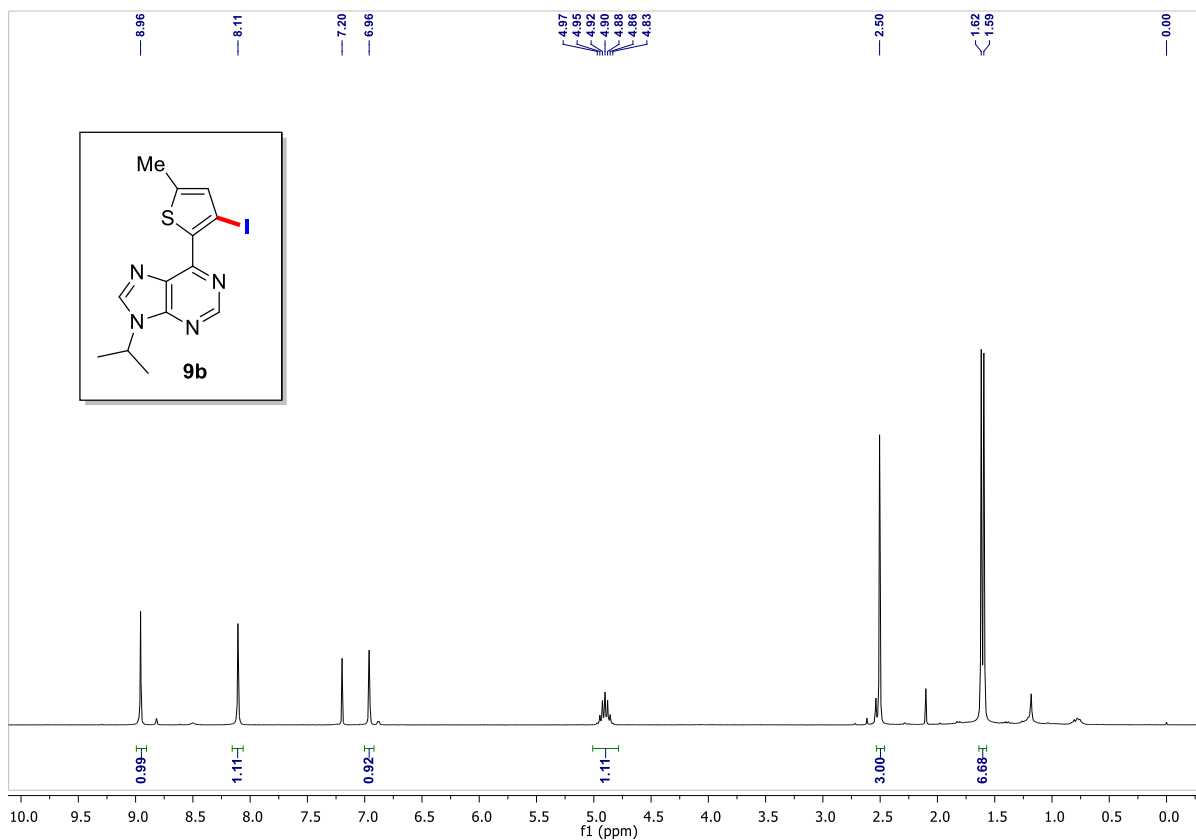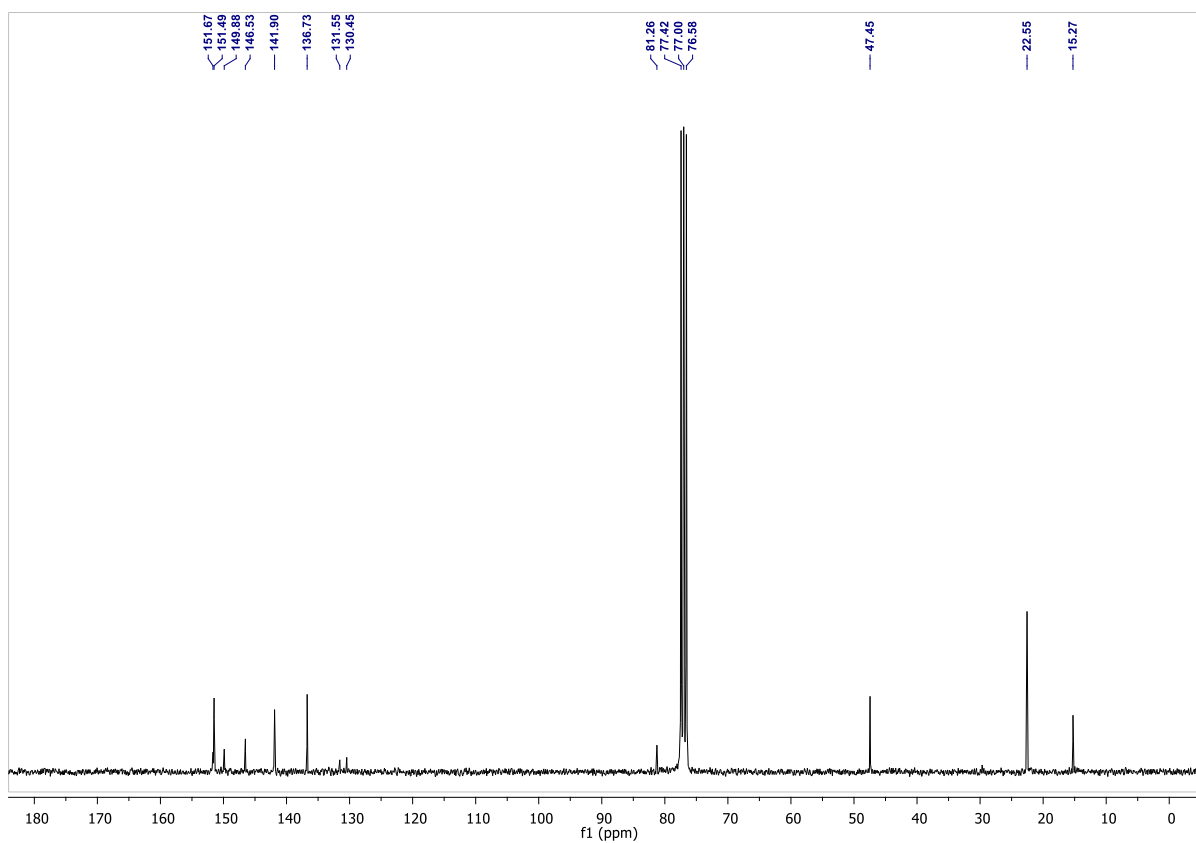

# 6-([1,1'-Biphenyl]-2-yl)-9-isopropyl-9H-purine (14)

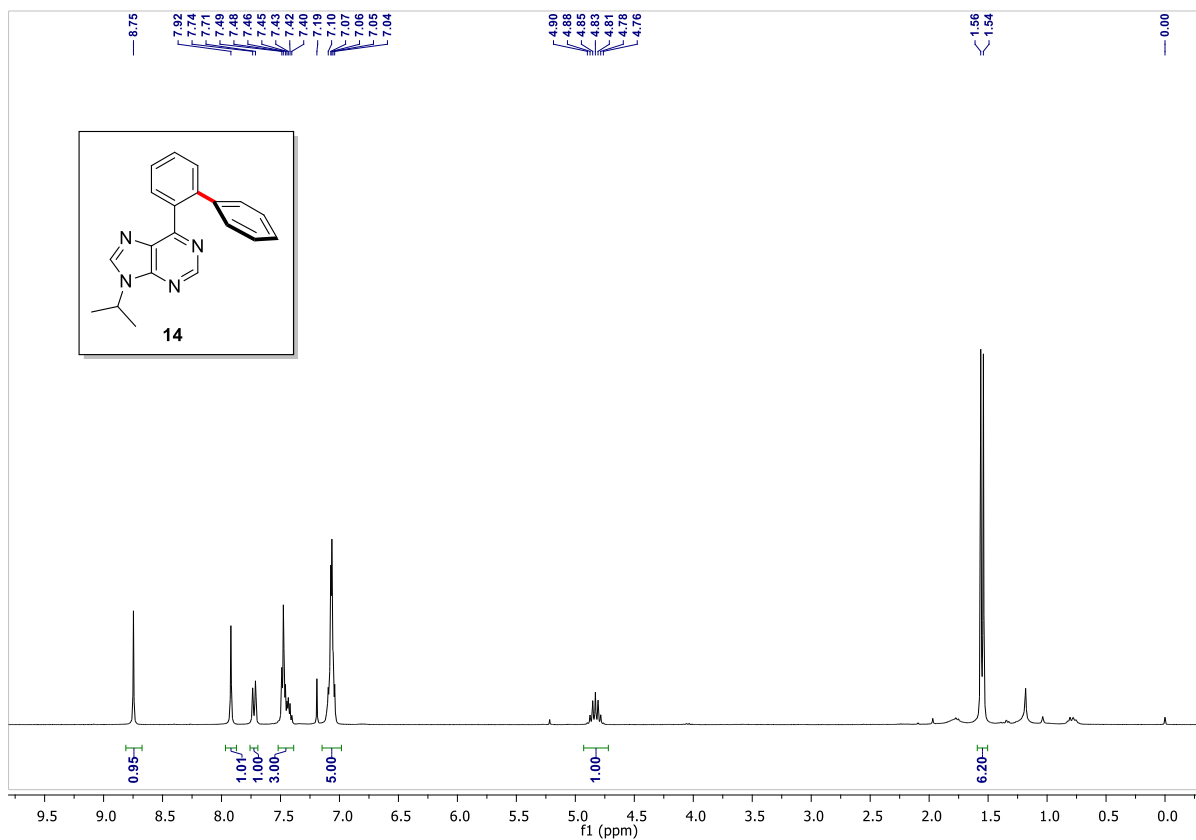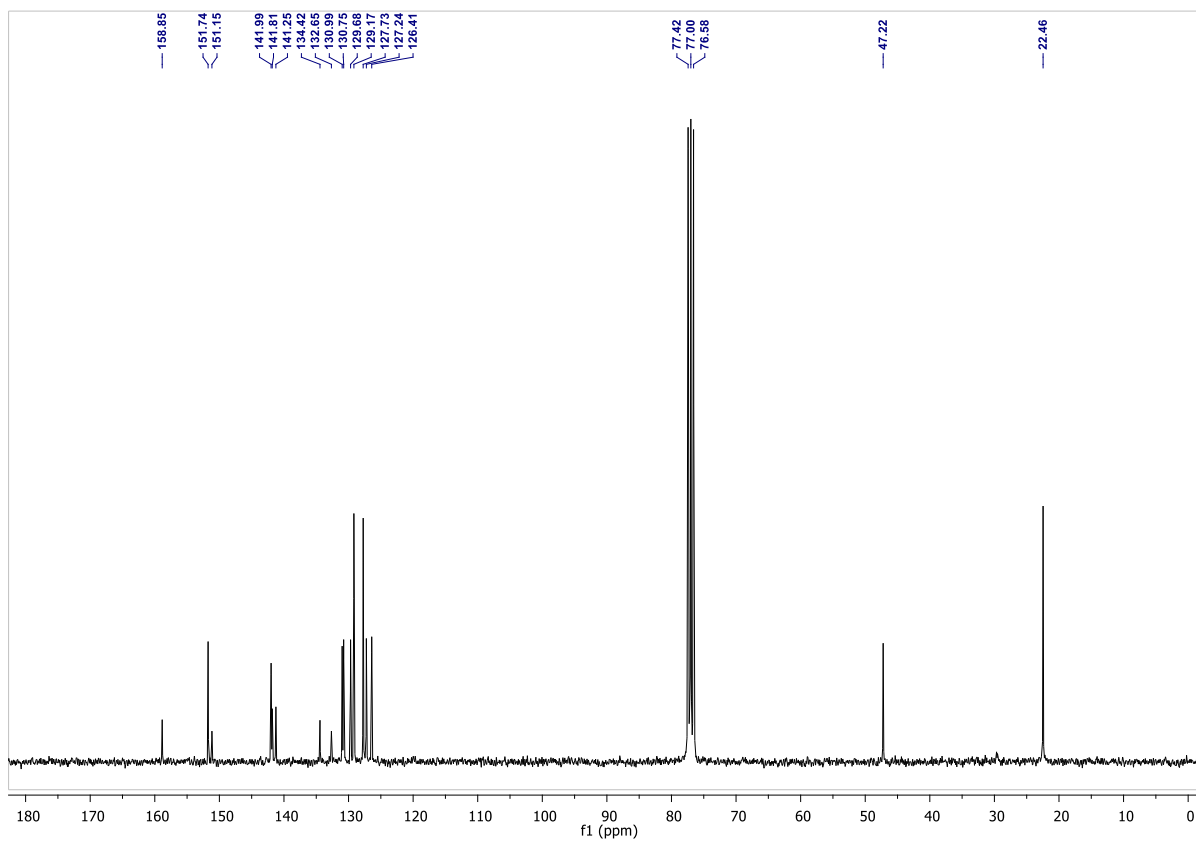

# 9-Isopropyl-6-(2-(phenylthio)phenyl)-9H-purine (16)

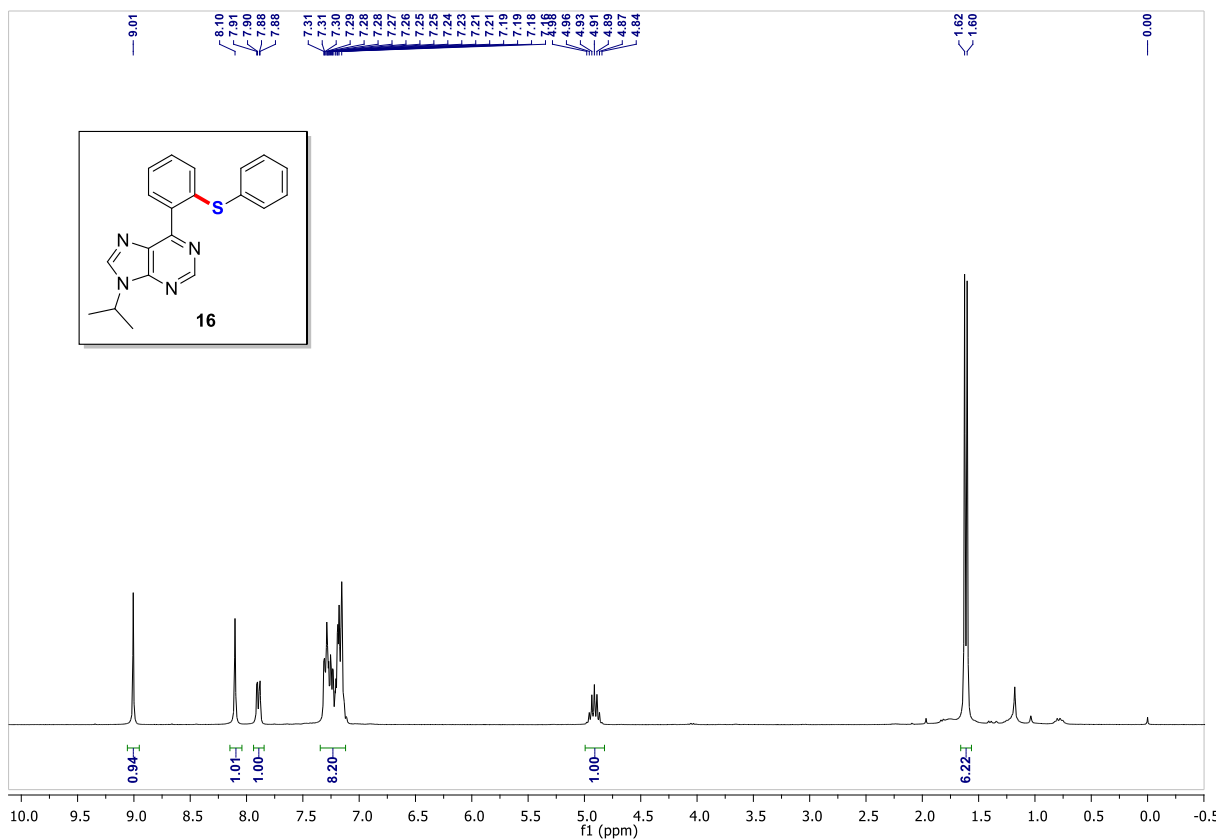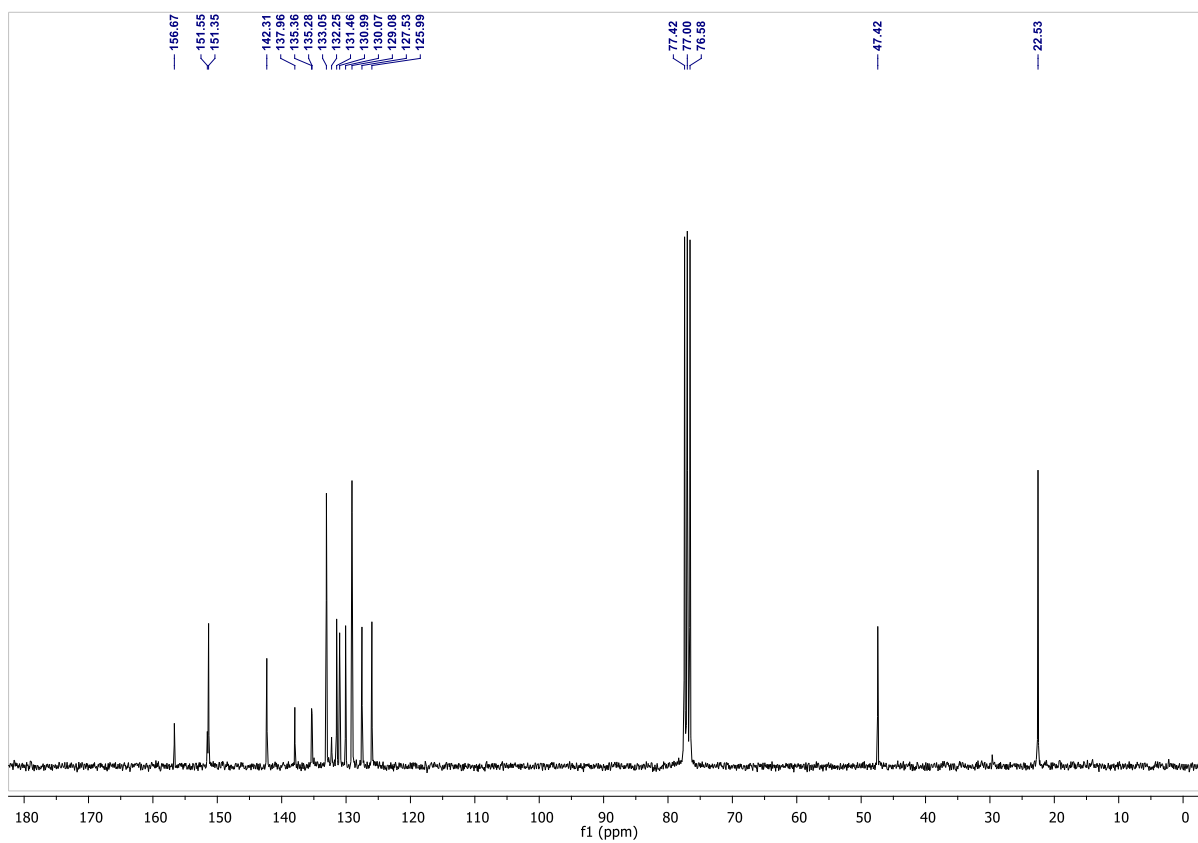

### 6-(2-Butoxyphenyl)-9-isopropyl-9H-purine (17)

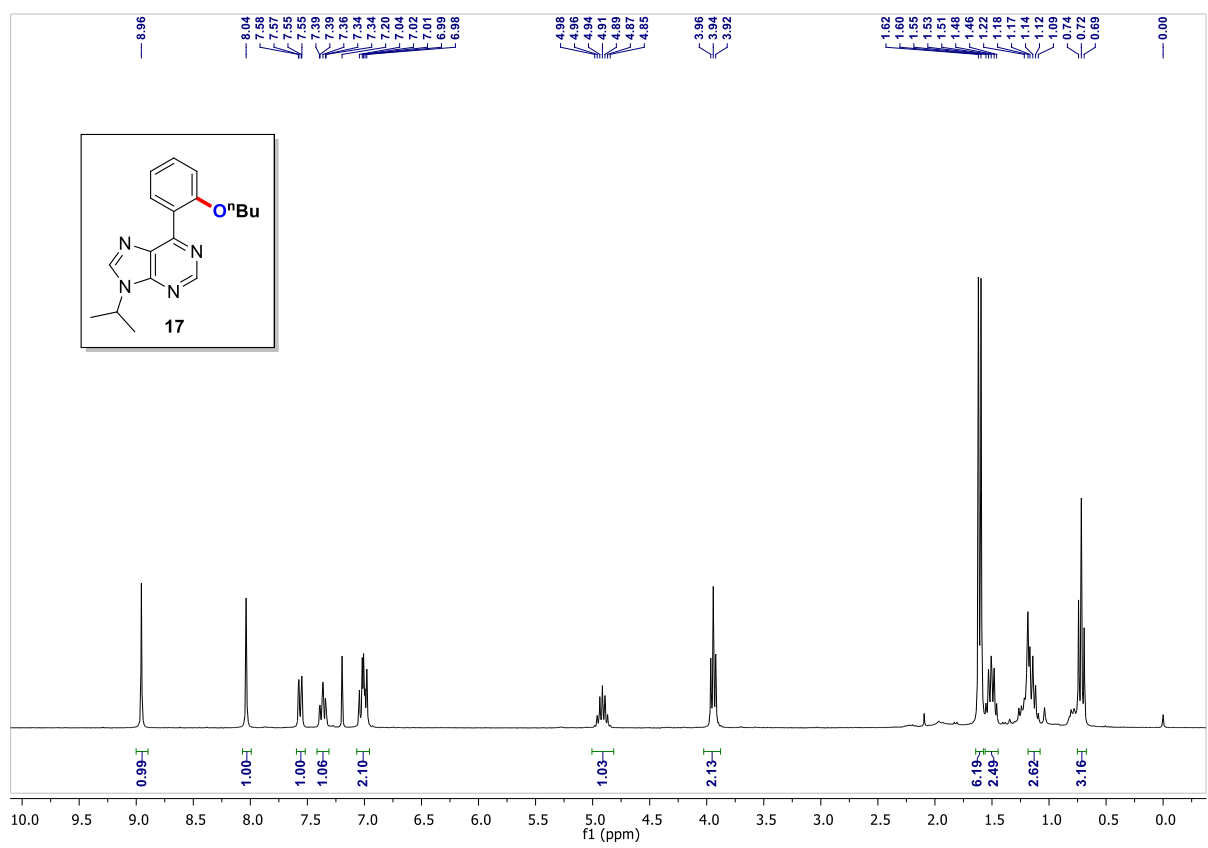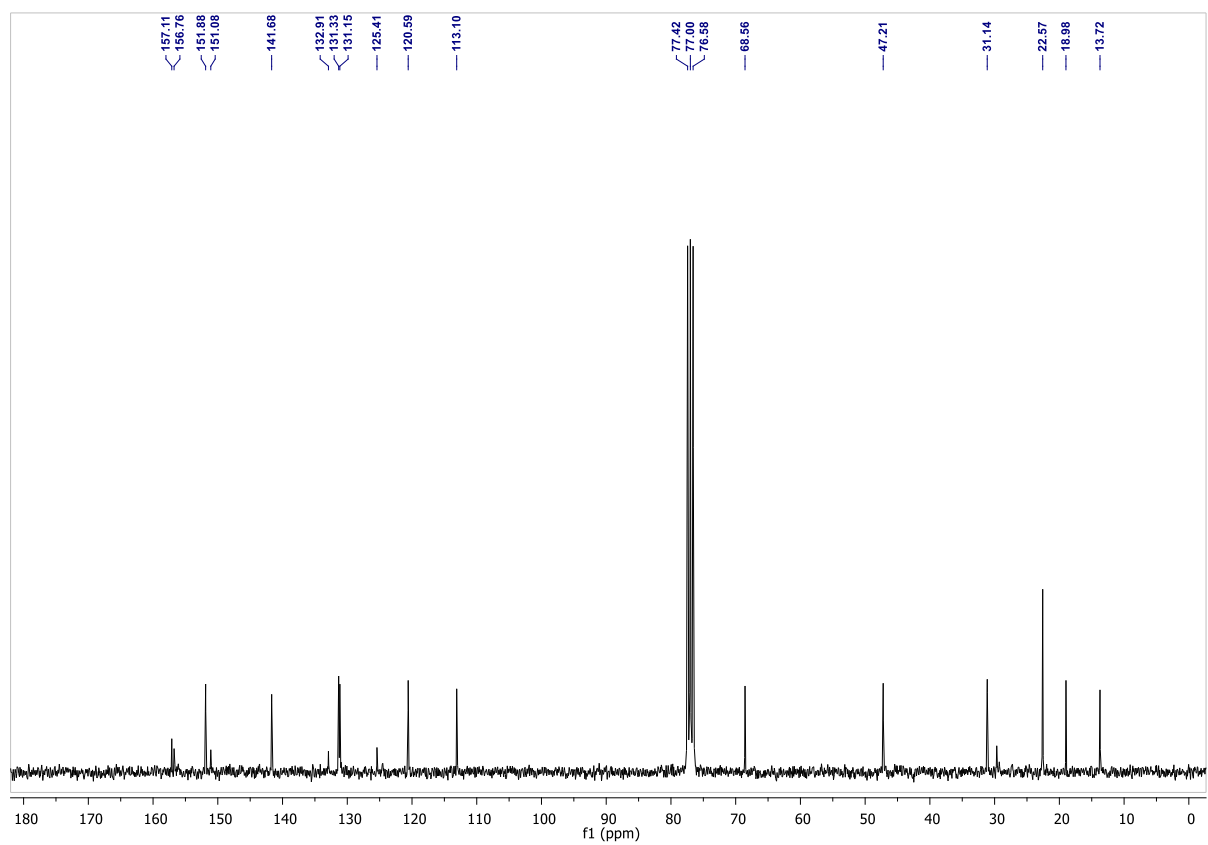

Supplement: c5ob02640g1.pdf [file c5ob02640g1.pdf]
